# Supplementary material
Source: publisher figshare collection journal article supplement (https://gsapubs.figshare.com/articles/dataset/_/12539975)

Cecil, M.R., Ferrer, M.A., Riggs, N.R., Marsaglia, K., Kylander-Clark, A., Ducea, M.N., and Stone, P., 2018, Early arc development recorded in Permian–Triassic plutons of the northern Mojave Desert region, California, USA: GSA Bulletin, <https://doi.org/10.1130/B31963.1>.

## **Data Repository**

data-point error symbols are  $2\sigma$

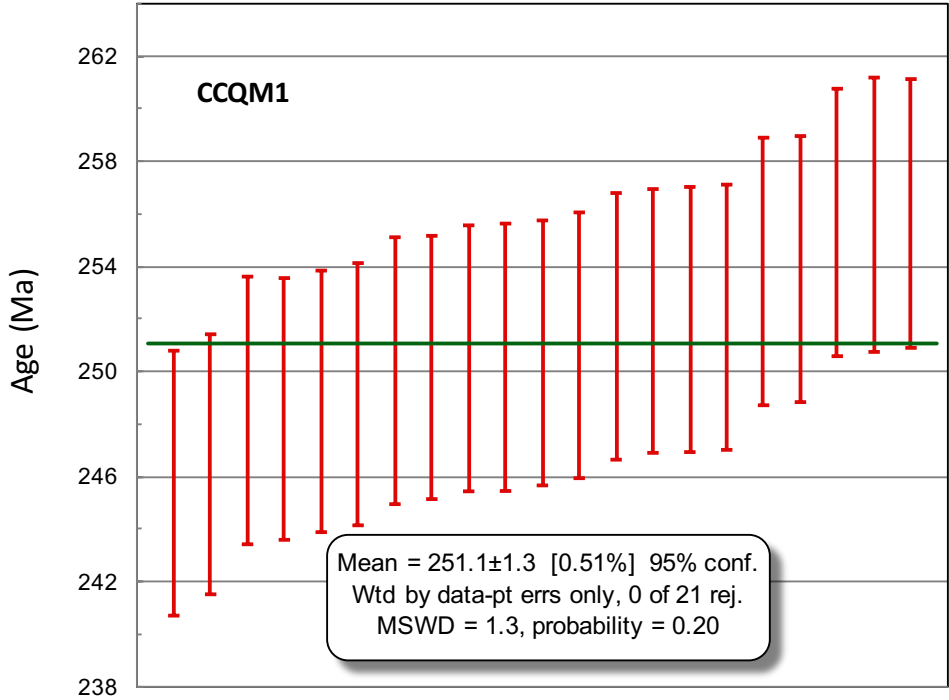

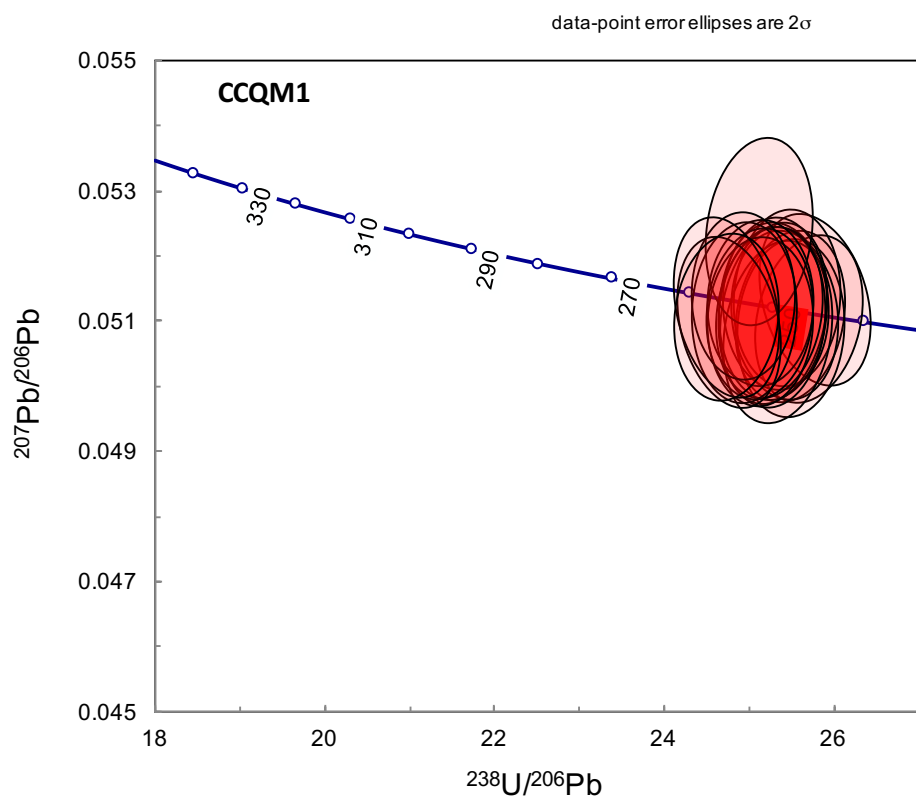

data-point error symbols are  $2\sigma$

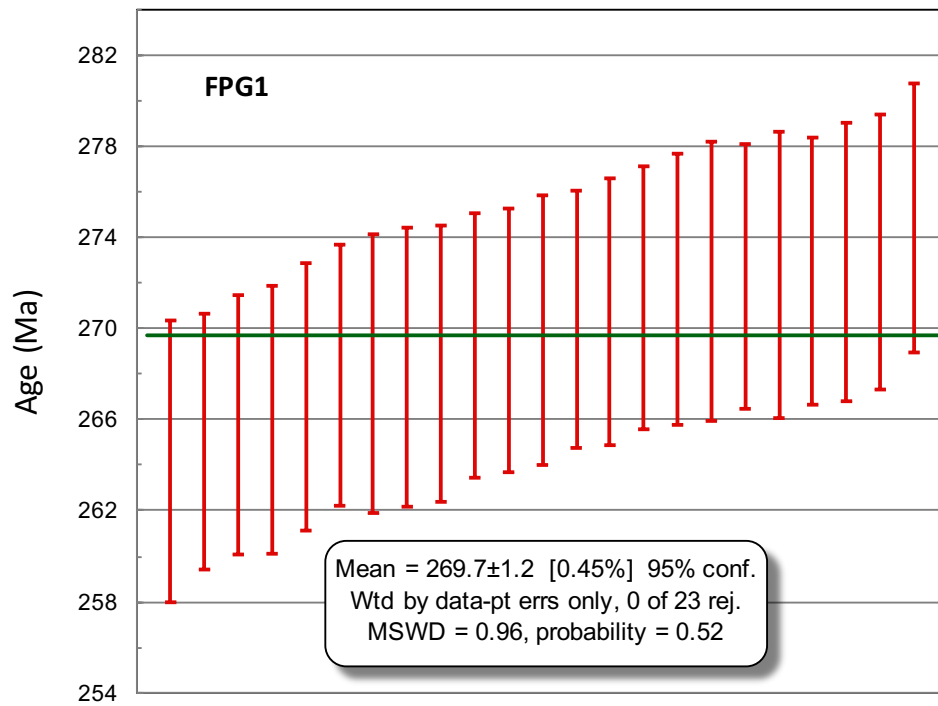

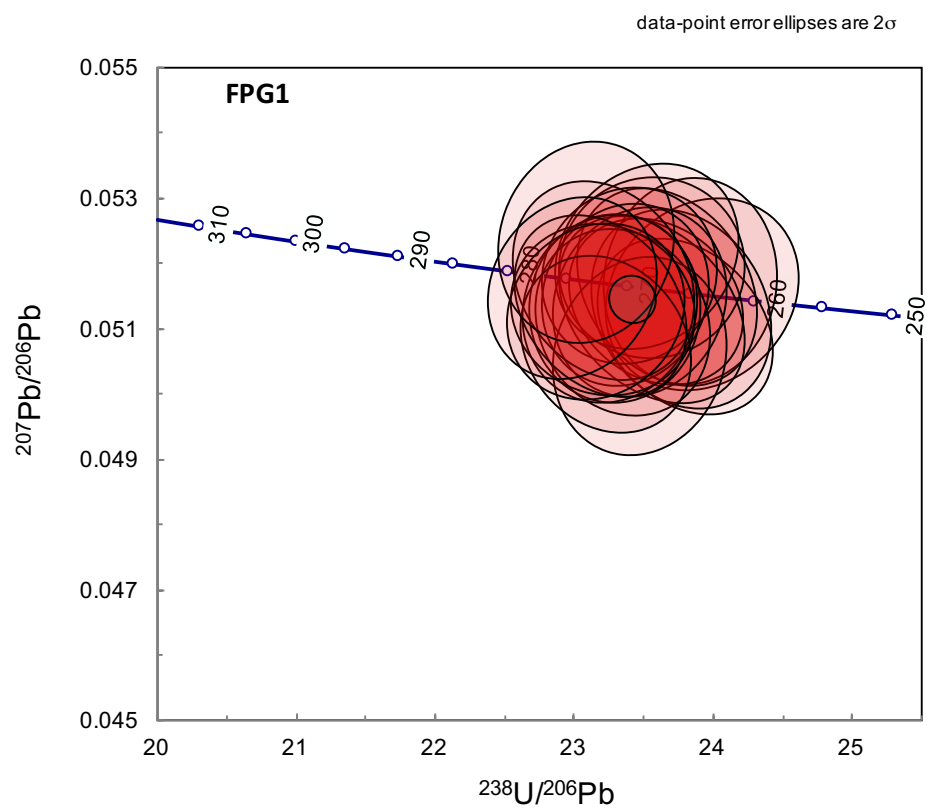

data-point errorsymbols are 2 $\sigma$

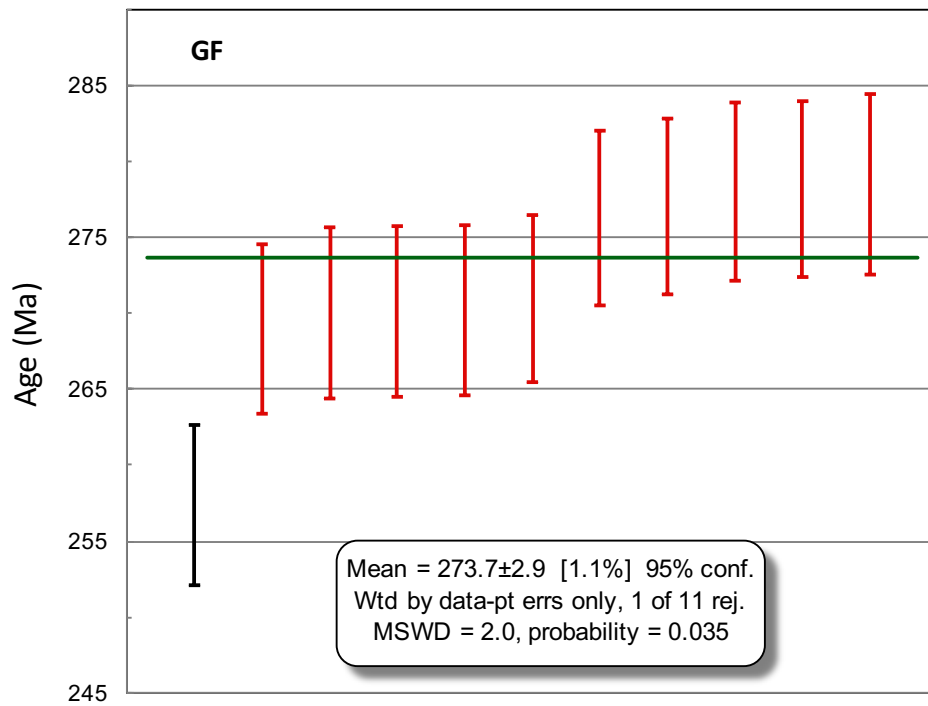

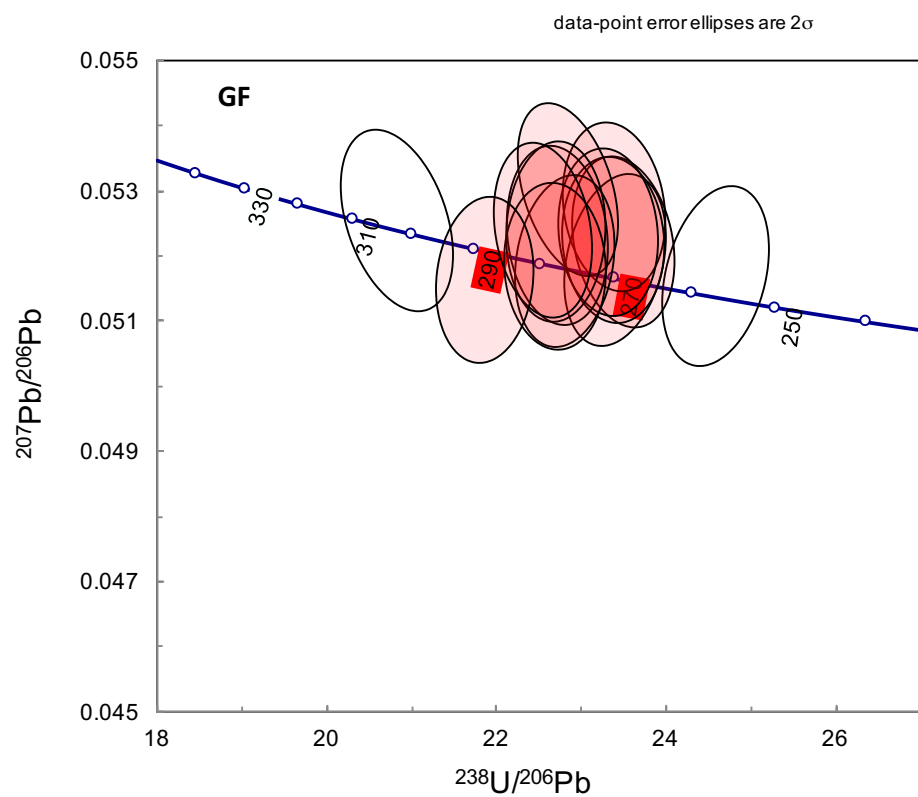

data-point error symbols are  $2\sigma$

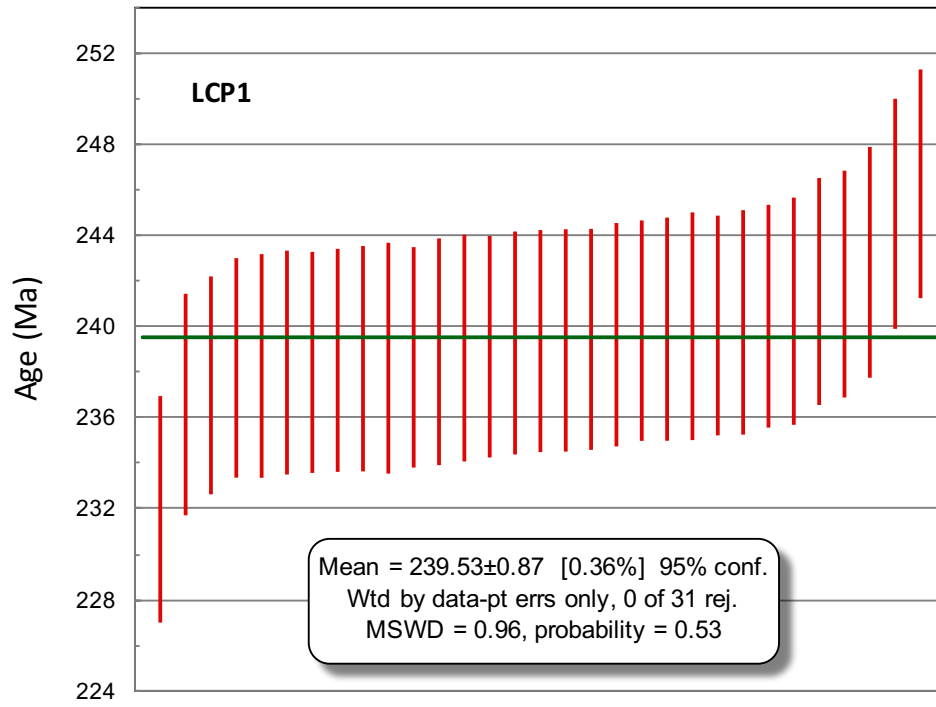



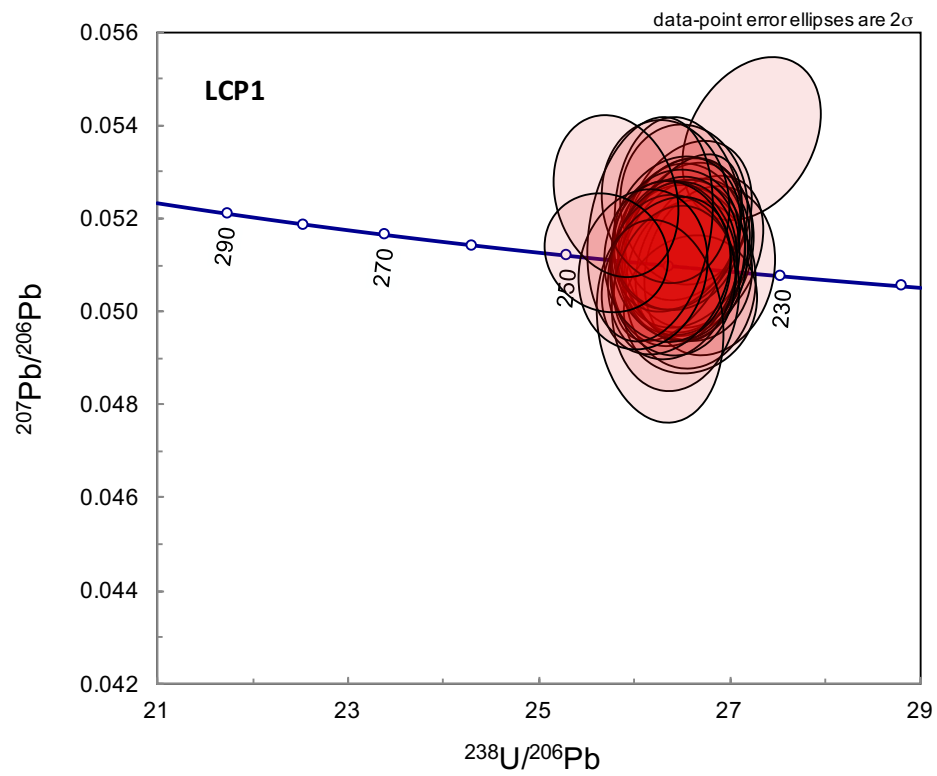

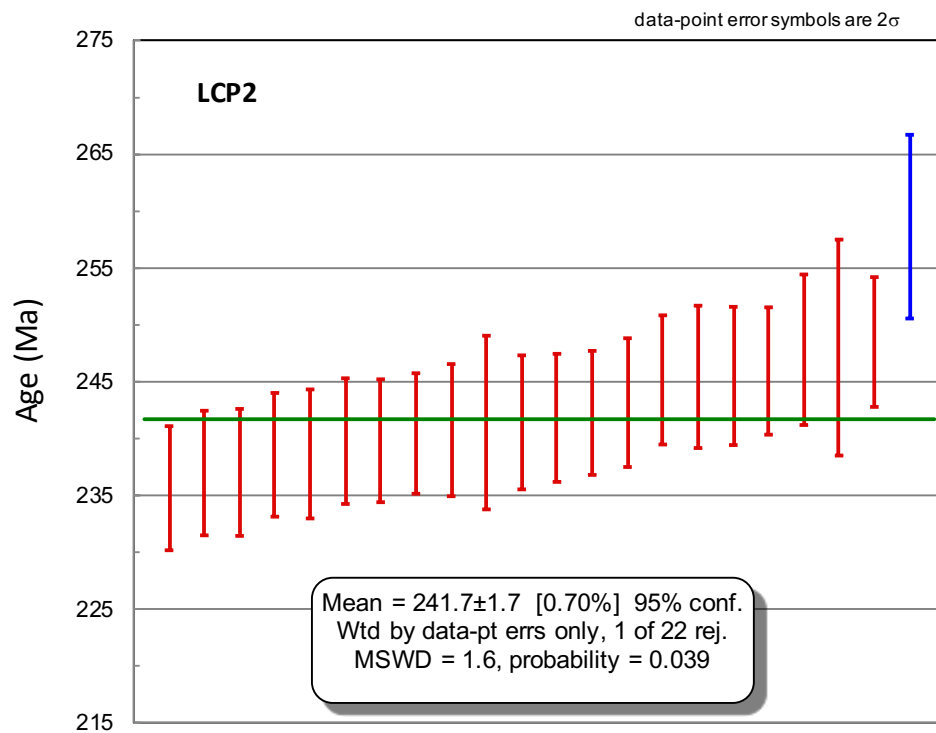

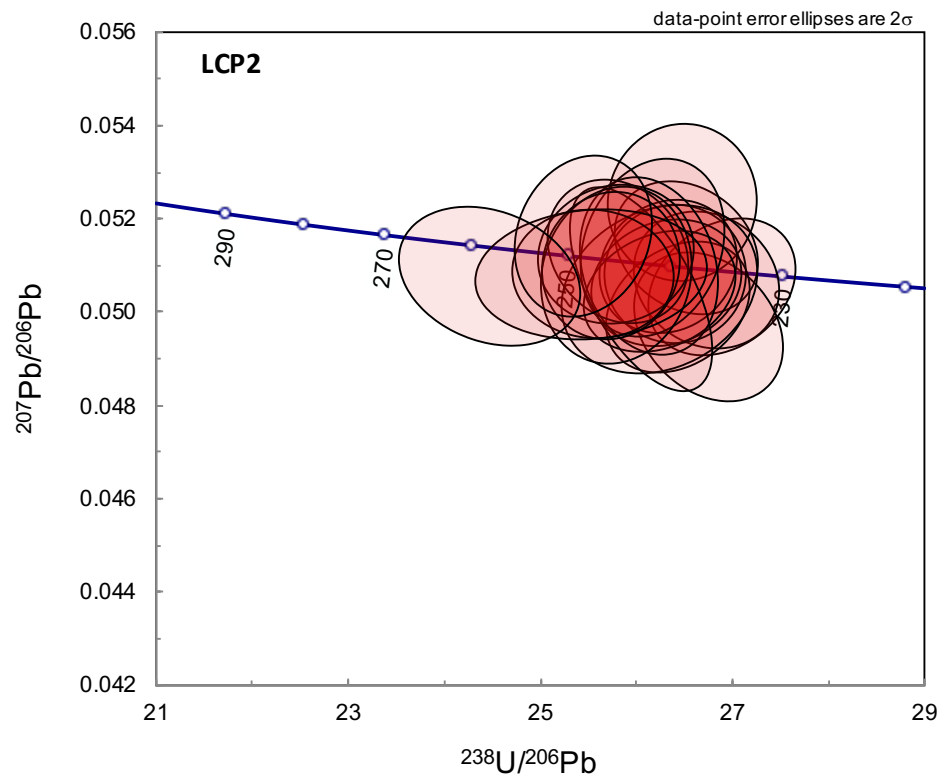

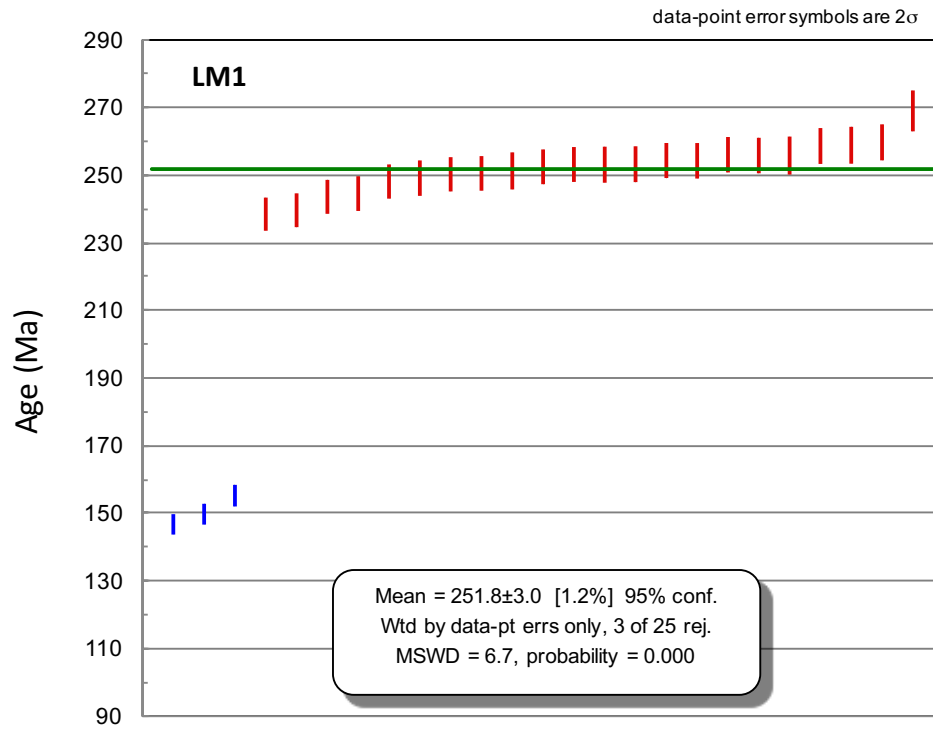

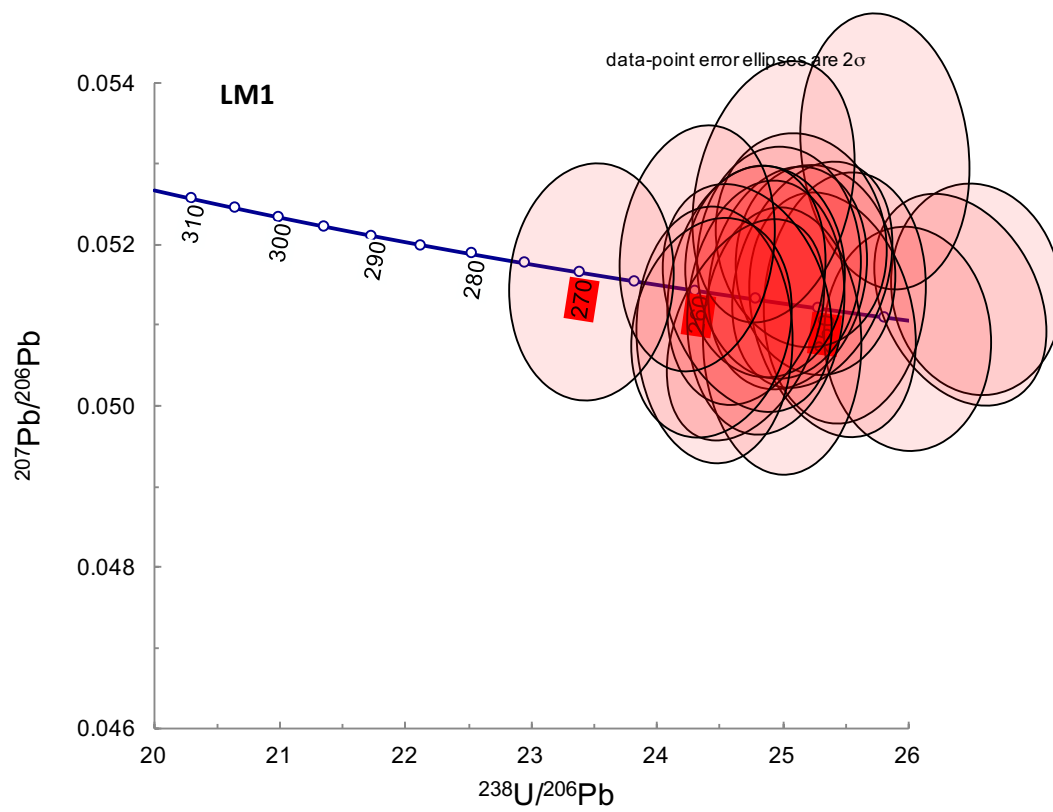

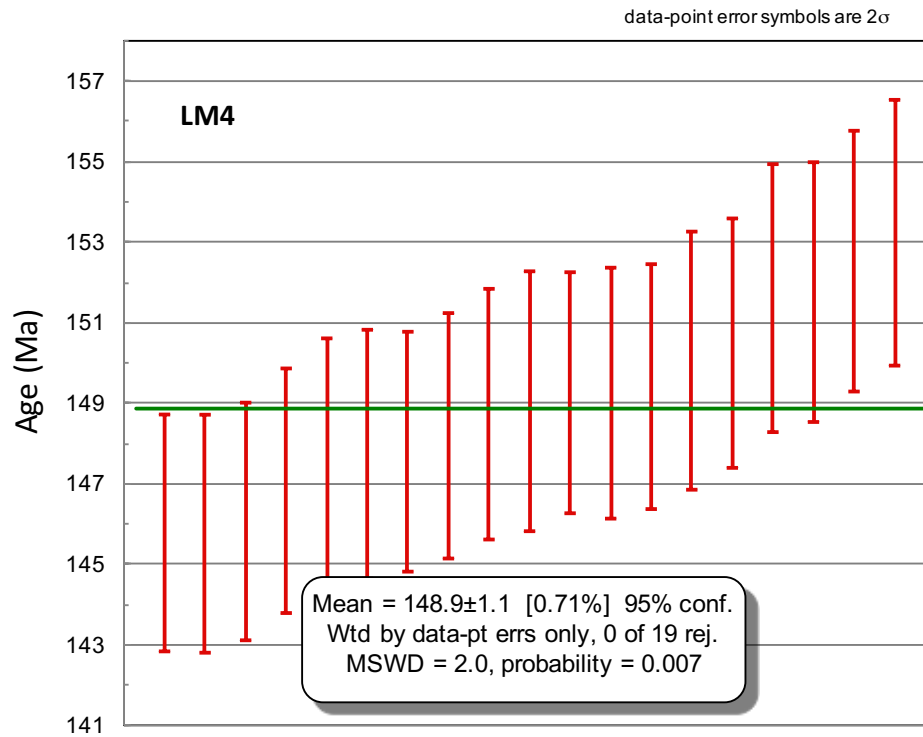

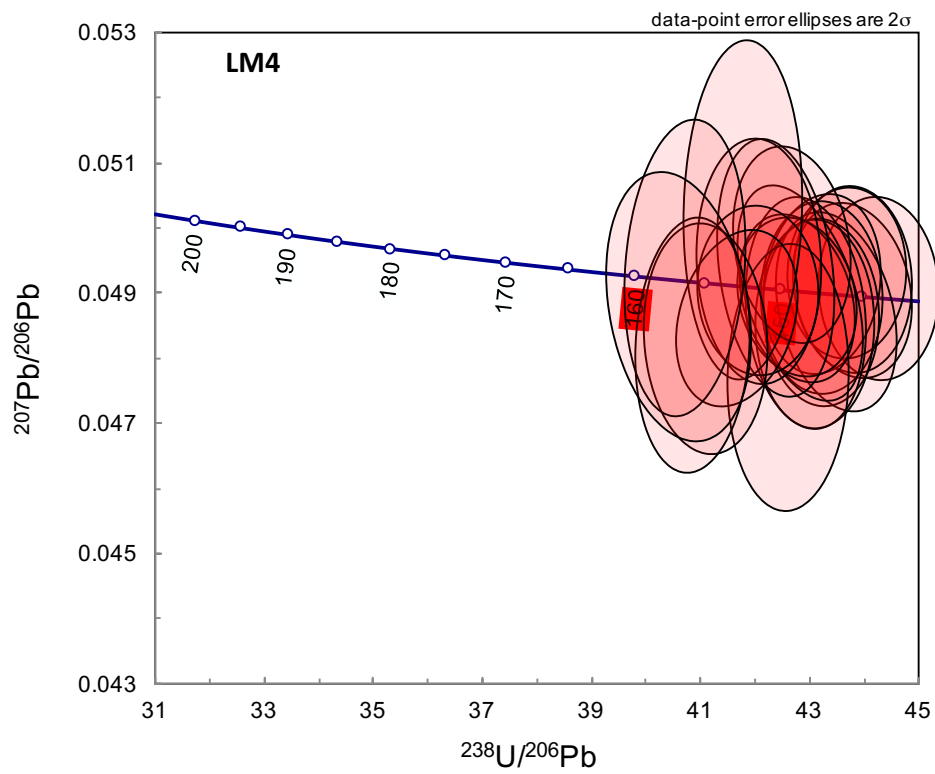

data-point error symbols are 2σ

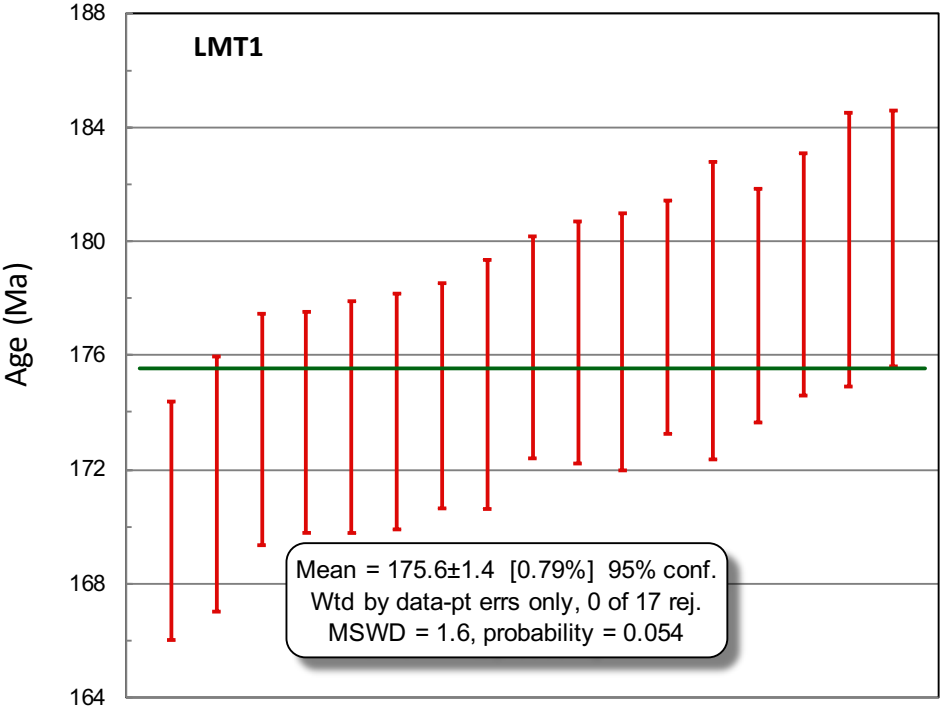



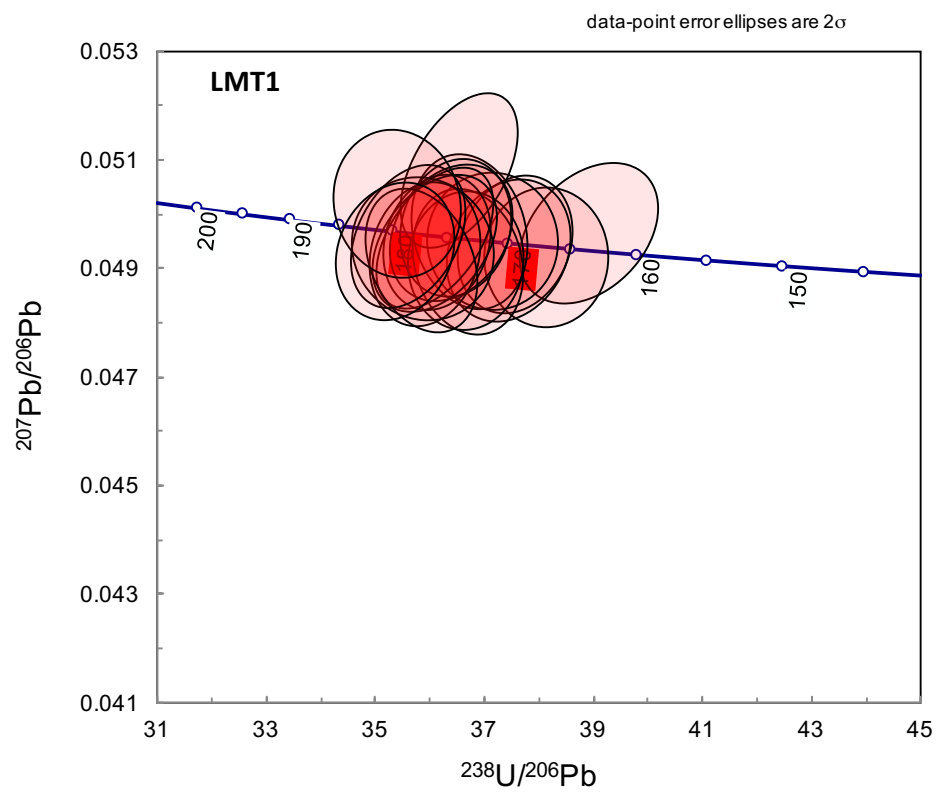

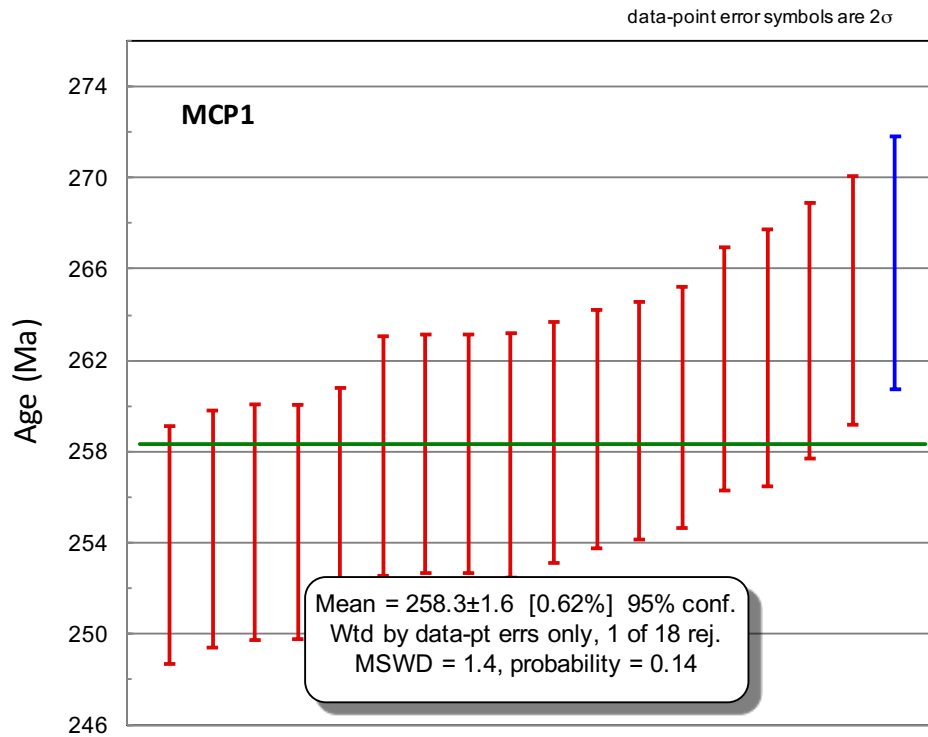

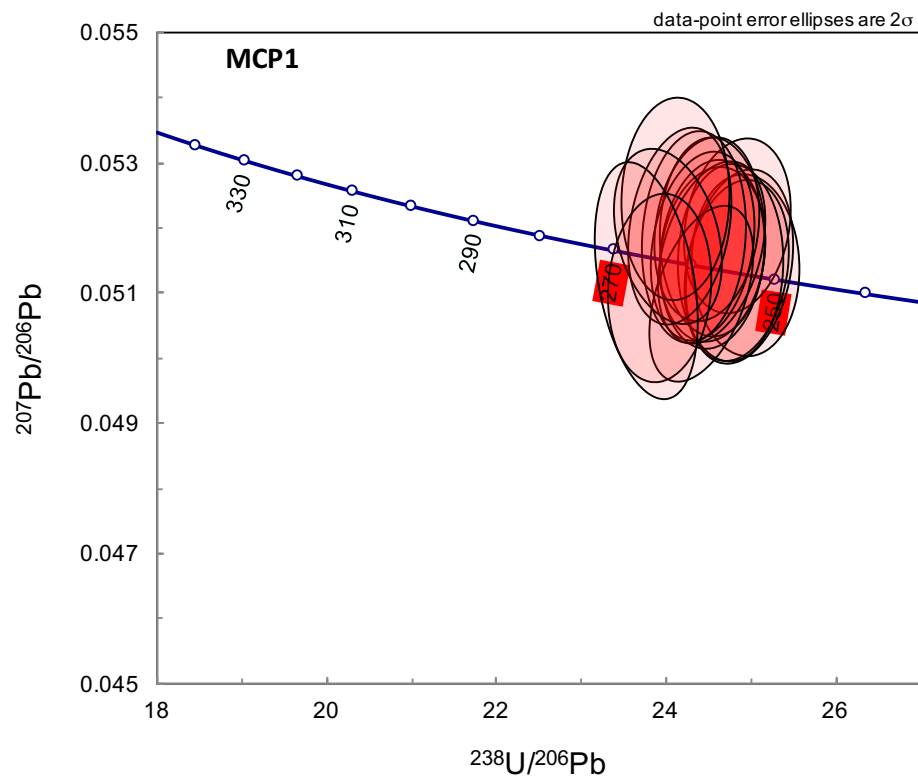

data-point error symbols are  $2\sigma$

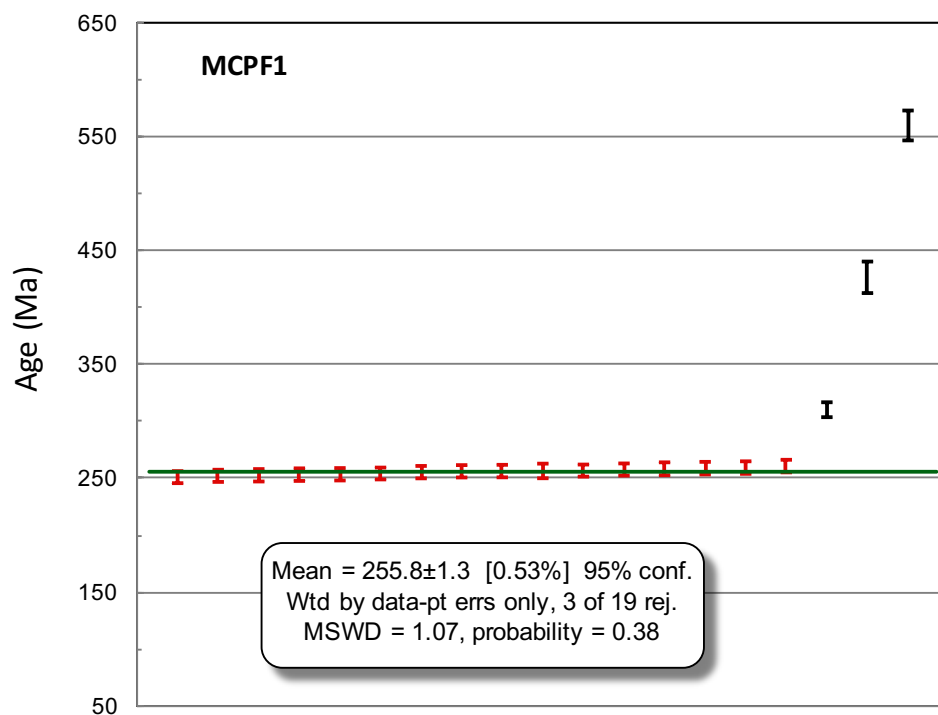

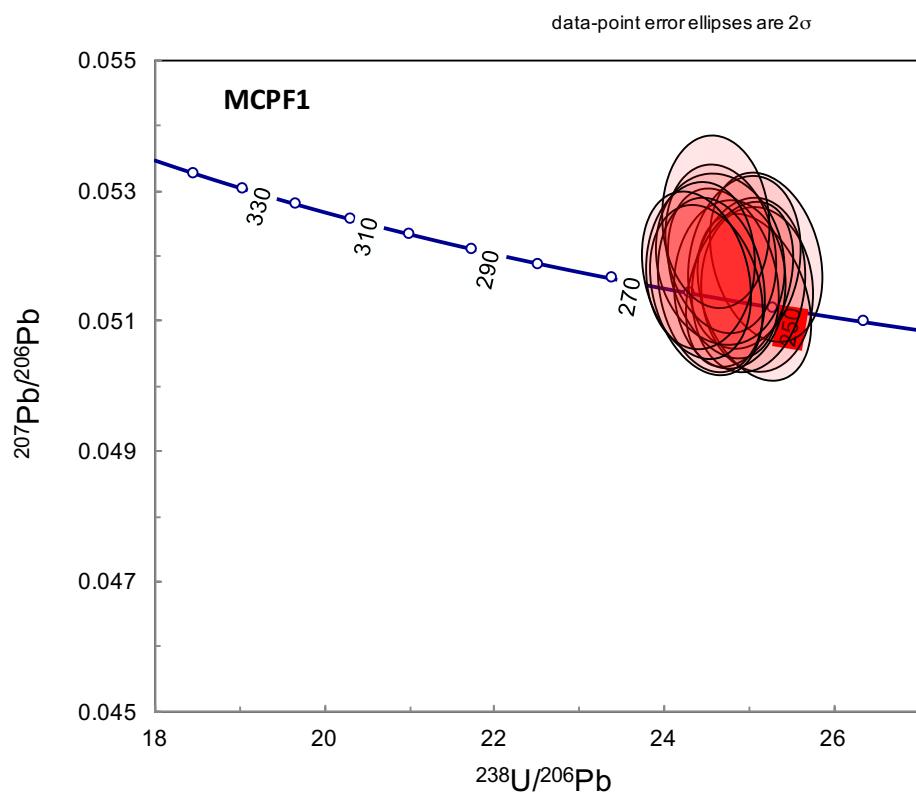

data-point error ellipses are  $2\sigma$

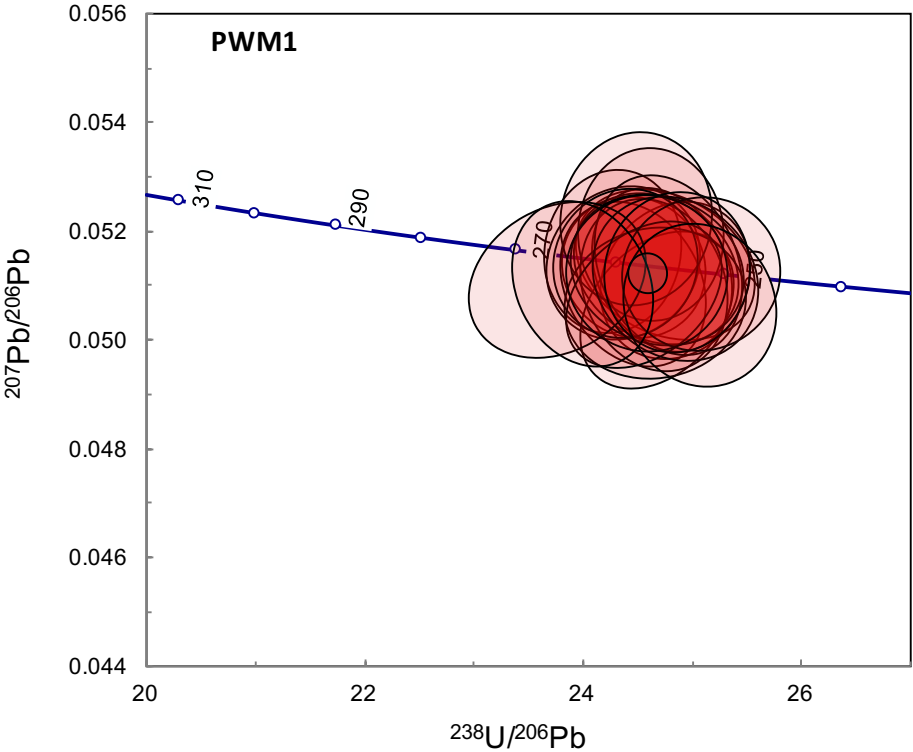

data-point error symbols are  $2\sigma$

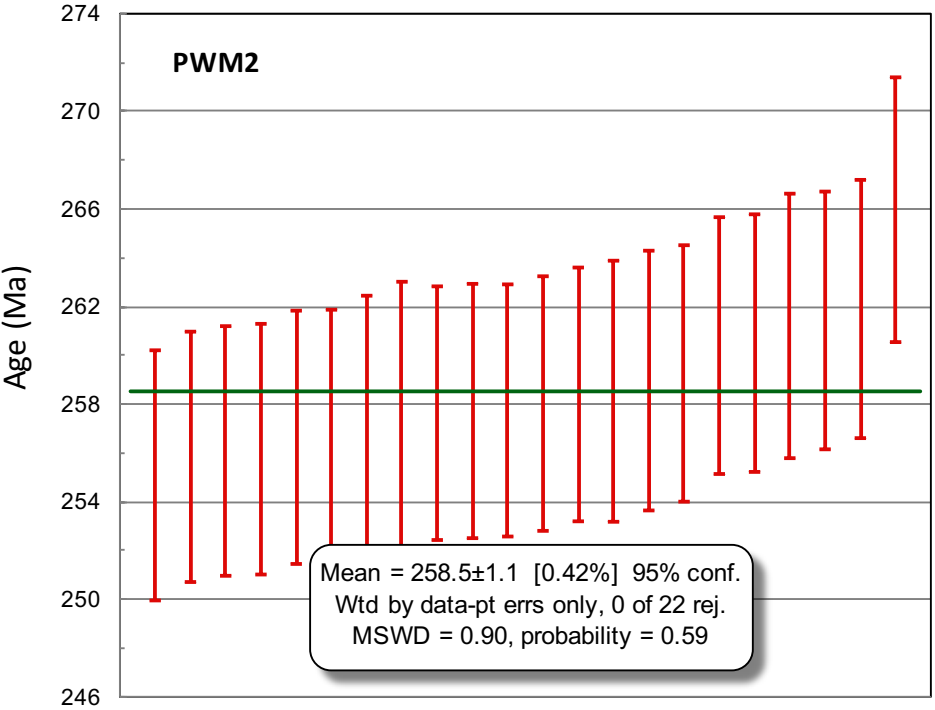

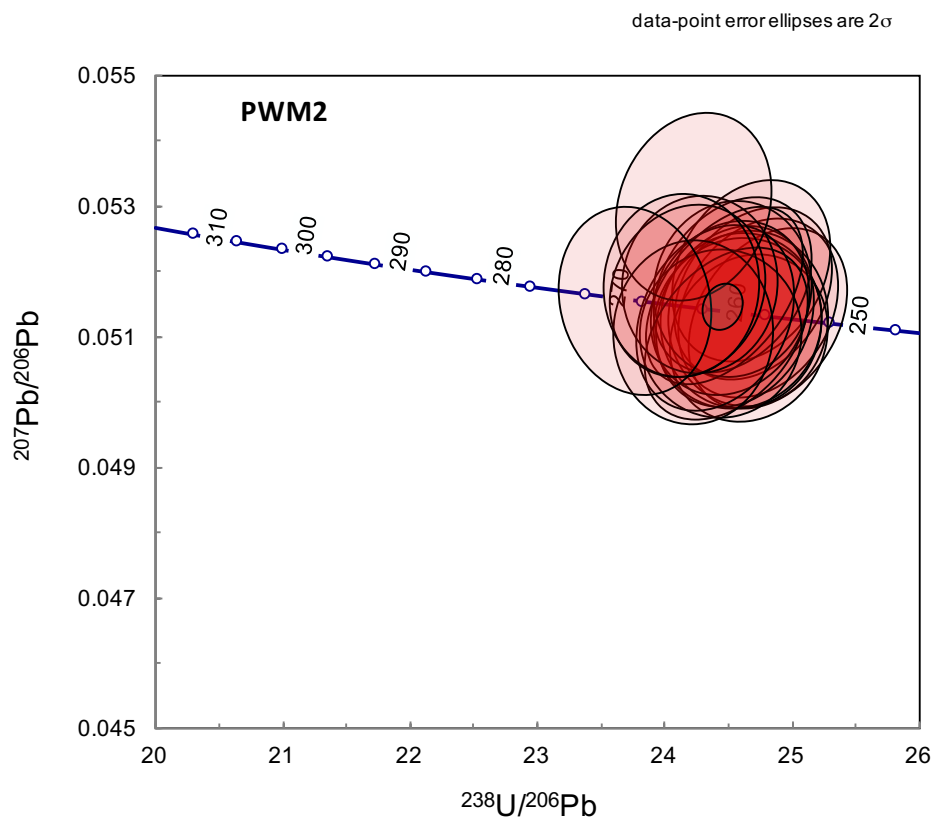



data-point error symbols are  $2\sigma$

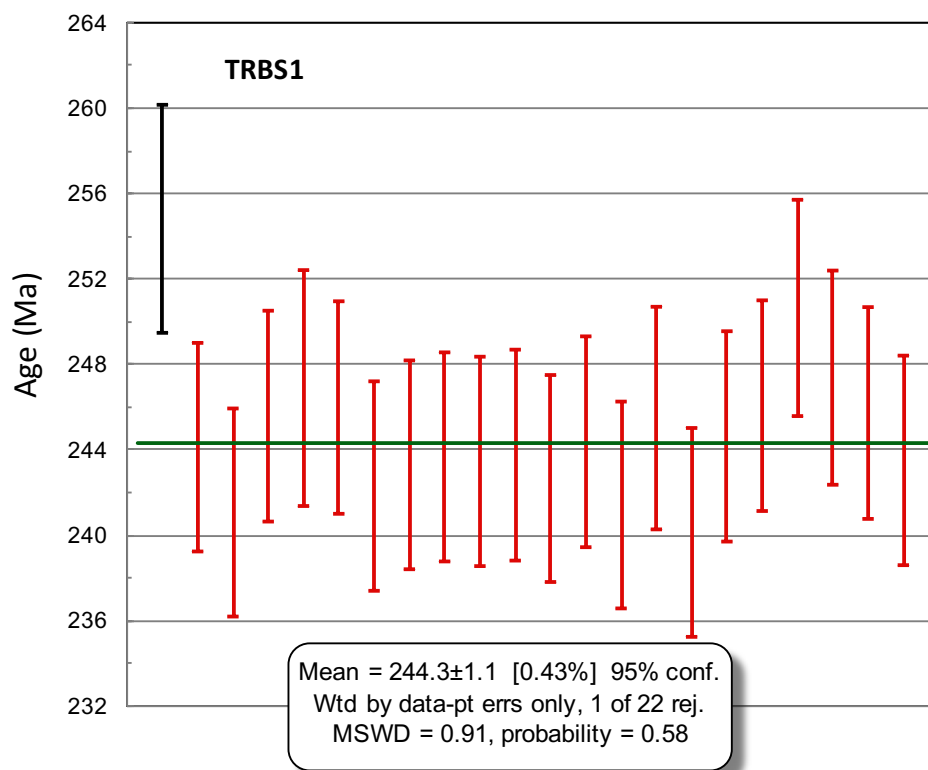

data-point error ellipses are  $2\sigma$

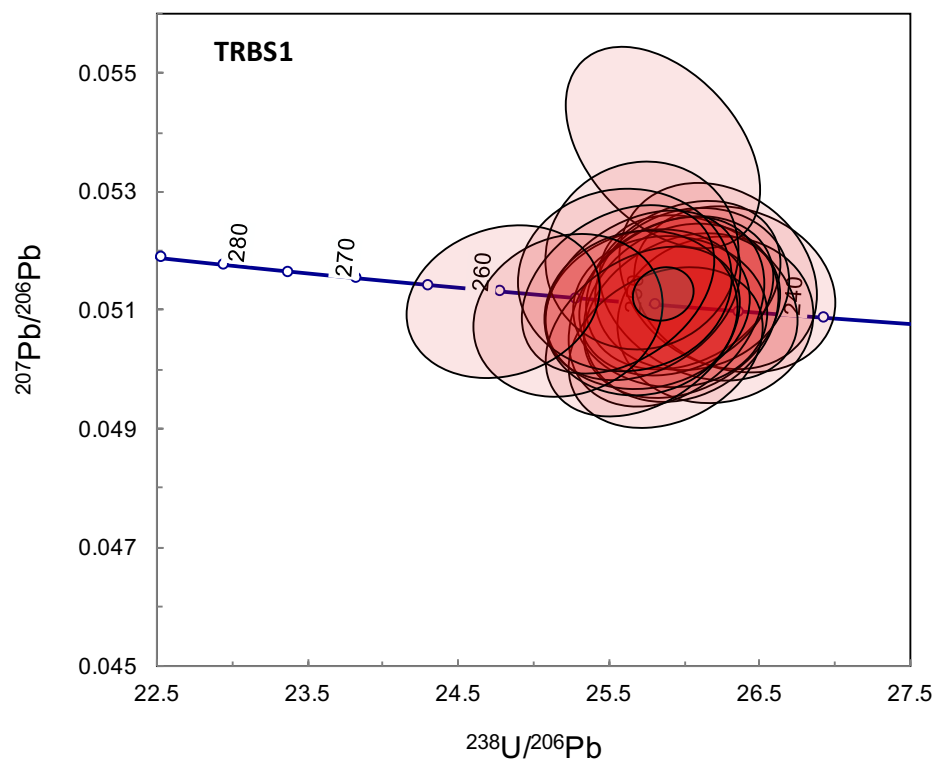

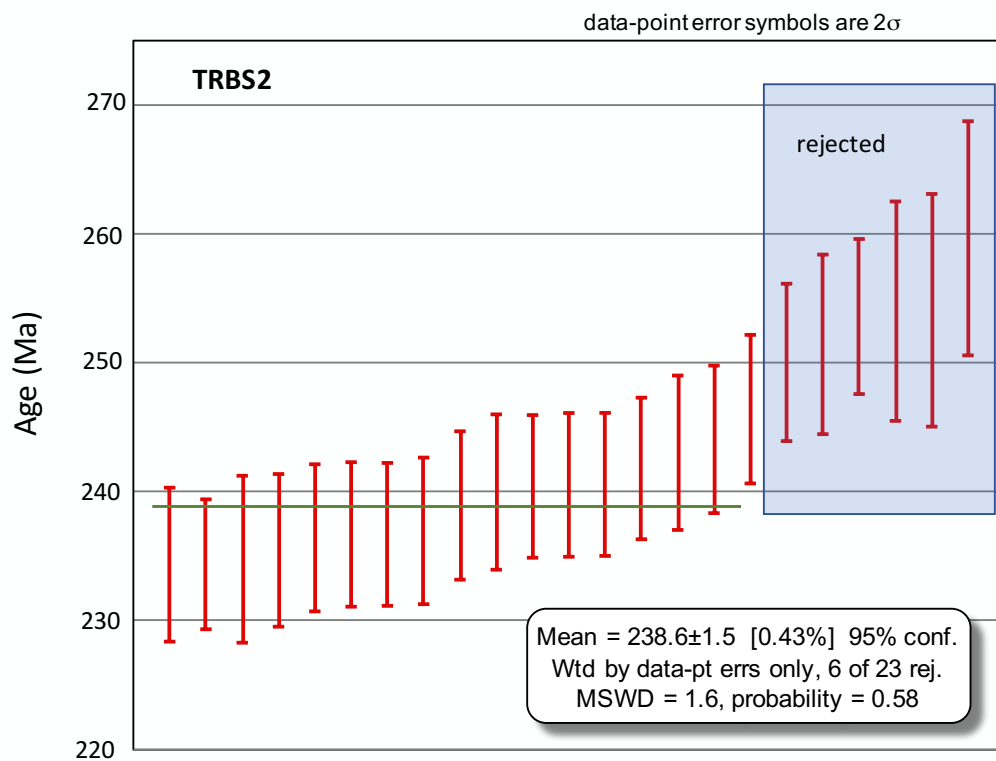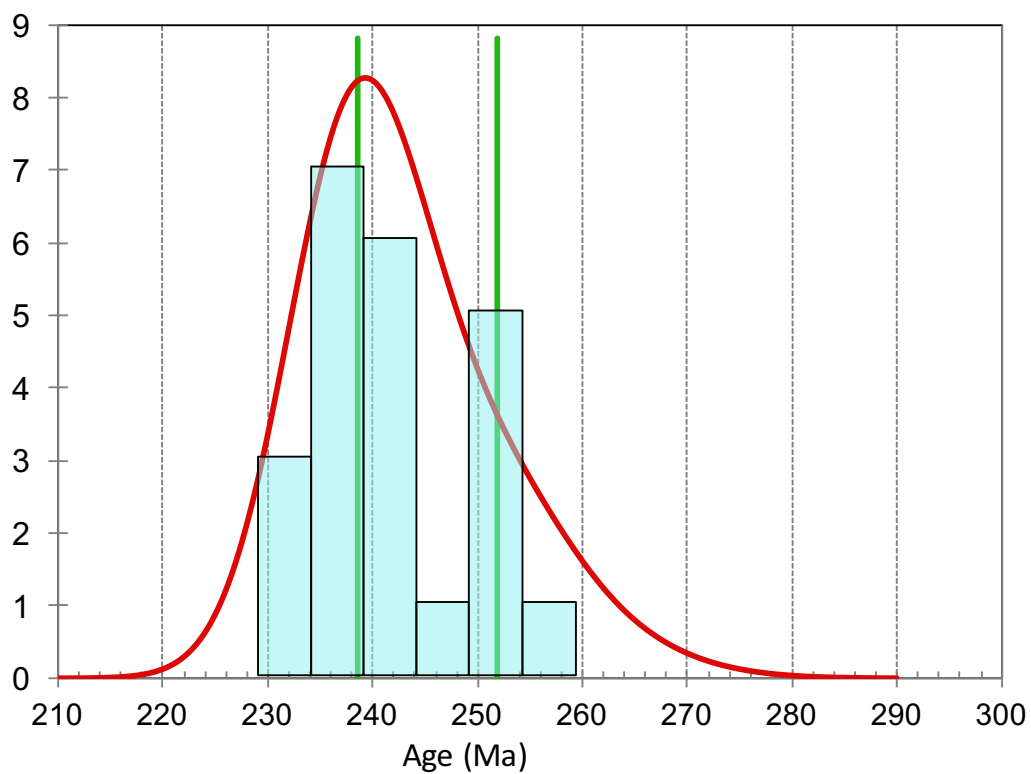

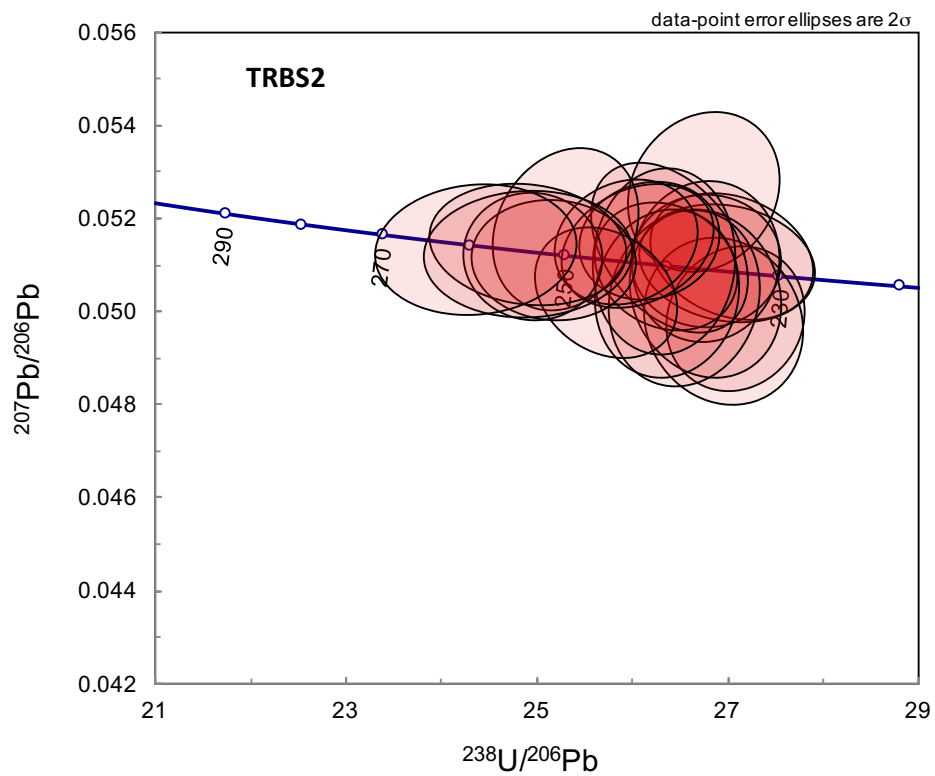

Supplement: Supplementary file 1 [file 1]
