# Supplementary material
Source: publisher figshare collection journal article supplement (https://gsapubs.figshare.com/articles/dataset/_/12539975)
Supplement: Supplementary file 1 [file 1]

## Sheet: zircon U Pb data
							Isotope Ratios					Ages
Analysis	U (ppm)	206Pb/204Pb	U/Th	207Pb*/206Pb*	± (%)	207Pb*/235U	± (%)	238U/206Pb	± (%)	206Pb*/238U	± (Ma)	207Pb*/235U	± (Ma)	206Pb*/207Pb*	± (Ma)
Sample LCP-2: (El Paso Mtns)
15EPM20-3	72	2079.17	2.21538	0.05175	2.44742	0.2629	2.44742	27.1739	3.82535	233.2	7.7	236.8	7.3	272	32
15EPM20-14	110.1	2938.46	2.47973	0.05055	2.39932	0.2586	2.39932	26.8745	2.33721	235.5	2.8	233.5	3.5	218	31
15EPM20-15	112.7	3156	3.36217	0.0507	2.39716	0.2609	2.39716	26.7165	2.33354	236.9	2.8	235.3	3.9	225	31
15EPM20-7	68.1	2056.52	2.03284	0.04968	2.65833	0.2556	2.65833	26.7451	2.37656	236.6	3	231	5.9	177	41
15EPM20-11	123.9	4152.38	2.19292	0.0514	2.29637	0.2664	2.29637	26.5111	2.30208	238.7	2.7	239.7	4.1	257	26
15EPM20-16	53.2	1450	2.86947	0.05238	2.66175	0.2709	2.66175	26.469	2.39823	239	3.1	243.3	4.2	298	40
15EPM20-5	134.3	3958.33	2.68064	0.05011	2.32084	0.2618	2.32084	26.4201	2.32669	239.5	2.8	236.1	3.6	198	27
15EPM20-20	87.2	2492	3.0922	0.05083	2.41717	0.2642	2.41717	26.3922	2.27396	239.7	2.5	237.9	4.4	231	31
15EPM20-22	136.2	4619.05	2.88559	0.05099	2.32048	0.265	2.32048	26.3158	2.22442	240.4	2.3	238.6	3.3	239	27
15EPM20-4	405	8806.45	3.02917	0.05064	2.22177	0.2644	2.22177	26.295	2.43767	240.6	3.3	238.1	3.6	223	22
15EPM20-24	63.2	1603.57	2.70085	0.0505	2.95713	0.2636	2.95713	26.2261	3.19491	241.2	5.9	237.4	6.2	216	48
15EPM20-2	368	12850	4.33962	0.05045	2.13023	0.2648	2.13023	26.2261	2.46589	241.2	3.4	238.5	3	215	17
15EPM20-8	56.96	1565.77	2.31733	0.0514	3.07417	0.2715	3.07417	26.1506	2.34747	241.9	2.9	243.8	4.7	253	52
15EPM20-18	46.7	1340	2.78308	0.051	3.0881	0.2676	3.0881	26.1165	2.2686	242.2	2.5	242	5.8	237	55
15EPM20-9	46.11	1105	2.94444	0.0505	3.58087	0.2679	3.58087	26.0349	2.34463	243	2.9	240.8	7.7	211	65
15EPM20-19	82.7	3605.88	4.25193	0.05132	2.47704	0.2743	2.47704	25.7931	2.33872	245.2	2.9	246	4.6	253	34
15EPM20-1	85.6	2678.26	9.79405	0.05126	2.39996	0.2736	2.39996	25.7666	2.57586	245.5	3.9	245.5	4.2	256	32
15EPM20-12	59	1521.43	2.66245	0.0508	3.09516	0.2692	3.09516	25.7732	2.49691	245.4	3.6	242	5	227	54
15EPM20-10	113.6	3622.17	3.46341	0.05101	2.56596	0.2719	2.56596	25.7202	2.29798	245.9	2.7	244.1	4.4	238	37
15EPM20-6	260	9250	4.51389	0.05083	2.23757	0.2741	2.23757	25.5297	2.69918	247.7	4.4	245.9	4.7	232	23
15EPM20-17	194	8687.5	2.33735	0.05082	2.27404	0.2728	2.27404	25.5102	3.87273	248.1	8.4	244.8	7.4	231	25
15EPM20-23	61.6	1816	4.37811	0.05165	2.77018	0.2805	2.77018	25.4323	2.31703	248.6	2.9	251	4.8	274	42
15EPM20-13	570	15538.5	2.4359	0.05101	2.16285	0.281	2.16285	24.9377	7.26333	253	17	251	15	244	18
15EPM20-21	100	2777.78	2.87356	0.05078	2.42904	0.289	2.42904	24.4499	3.15879	258.6	6.4	257.8	8	229	32
Sample LMT-1: (El Paso Mtns)
15EPM22-3	410.8	7384	1.09488	0.05508	2.26027	0.1825	2.26027	41.7711	2.50226	152.5	2.3	170.2	2.5	414	23
15EPM22-21	426	9976.19	1.21714	0.04968	2.14855	0.1759	2.14855	38.85	2.65639	163.8	2.8	164.5	2.2	179	18
15EPM22-22	692	26307.7	1.16538	0.04923	2.15874	0.18	2.15874	38.0807	2.44648	167.1	2.3	168	2	161	19
15EPM22-23	486	11063.6	1.07048	0.04947	2.1148	0.1822	2.1148	37.5094	2.29483	169.6	1.9	169.9	2.2	170	16
15EPM22-20	289.7	6581.82	1.70412	0.04936	2.18966	0.1818	2.18966	37.3832	2.475	170.2	2.4	169.6	2.3	164	21
15EPM22-24	492.5	13073.7	1.65158	0.04953	2.10806	0.185	2.10806	37.092	2.62892	171.5	2.9	172.3	2.8	172	15
15EPM22-12	243	6225	1.56774	0.04971	2.36774	0.187	2.36774	36.6703	2.3568	173.4	2.1	174	3	179	29
15EPM22-2	322.4	6644	1.57576	0.04915	2.25315	0.1859	2.25315	36.6435	2.24782	173.6	1.7	173.1	2.4	164	25
15EPM22-1	512	6650	1.34737	0.0538	3.73961	0.2004	3.73961	36.4166	3.04361	174.6	3.9	185.3	6.6	352	67
15EPM22-18	465	9512	1.30545	0.04917	2.14412	0.1853	2.14412	36.6032	2.35559	173.8	2.2	172.6	2.2	155	18
15EPM22-5	682	13033.3	0.786621	0.05085	2.31219	0.1924	2.31219	36.483	2.3927	174.3	2.3	178.7	1.8	232	27
15EPM22-6	438	9329.17	1.75481	0.04978	2.107	0.1881	2.107	36.4166	2.27894	174.6	1.9	175	2.3	184	15
15EPM22-7	660	15404.5	0.972018	0.04969	2.08914	0.188	2.08914	36.3372	2.51578	175	2.6	174.9	2.6	180	14
15EPM22-8	472	9461.54	1.3705	0.04951	2.07842	0.1892	2.07842	36.075	2.22457	176.3	1.7	175.9	1.6	172	13
15EPM22-16	555	13045.5	1.23608	0.04959	2.16415	0.1894	2.16415	36.036	2.42388	176.4	2.4	176.1	2.2	175	19
15EPM22-4	766	19650	1.24149	0.04949	2.10823	0.1892	2.10823	36.036	2.57481	176.4	2.8	175.9	2.5	171	15
15EPM22-14	495	7100	1.125	0.0557	3.07364	0.2186	3.07364	35.6379	2.32015	178.4	2.1	200.7	4.7	435	55
15EPM22-17	264.8	8612.5	1.7748	0.04929	2.22449	0.1883	2.22449	35.868	2.32401	177.3	2.1	175.2	2.2	164	22
15EPM22-19	346	6136.67	1.20979	0.04939	2.20623	0.1918	2.20623	35.8166	2.96199	177.5	3.8	178.1	4	170	21
15EPM22-9	290.6	6295.83	1.41	0.04917	2.22553	0.1887	2.22553	35.791	2.32271	177.7	2.1	175.5	3	155	23
15EPM22-13	414.1	11352.6	1.52355	0.04962	2.19601	0.1915	2.19601	35.5492	2.39376	178.8	2.3	177.9	2.3	176	21
15EPM22-11	412.7	12970.6	1.24495	0.05023	2.24297	0.1942	2.24297	35.3482	2.69257	179.9	3.2	180.9	3.9	204	23
15EPM22-15	372.4	9895	1.45298	0.04934	2.12207	0.1942	2.12207	35.3107	2.51106	180	2.7	180.2	2.3	166	17
15EPM22-10	395	10750	1.12536	0.04936	2.23282	0.1946	2.23282	34.9895	3.52618	181.6	5.2	180.5	5	163	23
Sample CCQM: (El Paso Mtns)
ccqm-17	344.6	16947.1	0.906842	0.05134	2.11936	0.2773	2.11936	25.7268	2.07169	245.8	1.3	248.5	2.1	255	16
ccqm-20	559.3	43090.9	0.965976	0.05104	2.07914	0.2746	2.07914	25.6608	2.02763	246.47	0.81	246.4	1.3	242	13
ccqm-21	426.6	21429.4	1.27154	0.05108	2.12713	0.2763	2.12713	25.4453	2.07015	248.5	1.3	247.7	1.6	244	17
ccqm-6	142.7	6563.16	2.24831	0.0509	2.21963	0.2764	2.21963	25.4453	2.02317	248.52	0.71	247.8	2.1	235	22
ccqm-15	240	3755.56	1.25392	0.0605	6.59173	0.332	6.59173	25.1067	2.24936	251.8	2.5	290	17	590	110
ccqm-4	184.5	8225	1.793	0.05137	2.18343	0.28	2.18343	25.4001	2.01942	248.93	0.71	250.7	1.9	260	21
ccqm-1	550	23795.2	0.942103	0.0511	2.09575	0.2781	2.09575	25.3807	2.02306	249.14	0.78	249.1	1.6	245	14
ccqm-11	158.8	9006.67	1.37608	0.05084	2.27384	0.2776	2.27384	25.2972	2.05118	249.9	1.1	248.7	2.5	232	25
ccqm-9	413.5	20923.5	1.30442	0.05124	2.06825	0.2793	2.06825	25.2717	2.02286	250.17	0.76	250.1	1.4	251	12
ccqm-13	184.1	9737.5	1.43046	0.05113	2.24373	0.2792	2.24373	25.2398	2.04036	250.49	0.98	250	2	250	22
ccqm-23	179	9606.25	1.79359	0.0512	2.26105	0.2793	2.26105	25.2334	2.05093	250.6	1.1	250.1	2.4	249	24
ccqm-18	200.3	10625	1.59856	0.05107	2.24427	0.2787	2.24427	25.2207	2.03093	250.65	0.86	249.6	2.2	243	24
ccqm-24	241.8	13966.7	2.05438	0.05114	2.12027	0.2805	2.12027	25.1889	2.03538	250.97	0.9	251	1.5	246	16
ccqm-5	160.8	11030.8	1.89623	0.0524	2.26763	0.2888	2.26763	25.0752	2.03506	252.07	0.93	257.6	2.3	307	26
ccqm-8	500.4	29400	1.91138	0.05129	2.05401	0.2822	2.05401	25.0903	2.01299	251.94	0.56	252.43	0.97	254	11
ccqm-16	280	15860	1.17057	0.051	2.10207	0.2806	2.10207	25.0941	2.02254	251.91	0.76	251.1	1.5	240	15
ccqm-22	301.6	17460	1.32688	0.05112	2.12036	0.2815	2.12036	25.0815	2.02252	252	0.76	251.8	1.6	245	16
ccqm-10	208.6	12871.4	1.3634	0.05114	2.24364	0.2833	2.24364	24.9066	2.02604	253.78	0.81	253.3	2.3	246	24
ccqm-7	357.3	26491.7	1.69578	0.0514	2.06783	0.2849	2.06783	24.8892	2.01452	253.93	0.6	254.6	1.3	258	12
ccqm-14	250.1	10765	1.89183	0.05099	2.12757	0.2841	2.12757	24.7274	2.01101	255.57	0.53	253.9	1.9	240	17
ccqm-12	180.1	9205.88	1.45359	0.05122	2.23415	0.2856	2.23415	24.6914	2.06006	255.9	1.3	255.1	2.7	250	23
ccqm-19	236.2	1007.27	1.59057	0.104	11.7105	0.616	11.7105	23.015	2.59729	274.2	4.4	490	53	1690	240
ccqm-2	318.5	16288.9	1.48693	0.05107	2.07379	0.2859	2.07379	24.6914	2.01836	255.95	0.69	255.3	1.1	244	13
ccqm-3	40.2	10100	1.46769	0.07557	2.06551	1.854	2.06551	5.6319	2.03528	1053.6	3.7	1064.7	3.8	1083	10
Sample GF: (El Paso Mtns)
GF-7	149.6	3417.5	4.05091	0.04955	2.38082	0.1531	2.38082	44.6229	2.22795	142.9	1.4	144.6	2.5	172	31
GF-14	198.9	6971.43	1.55391	0.05171	2.20492	0.2896	2.20492	24.5399	2.07159	257.5	1.3	258.2	1.7	276	22
GF-5	826	45266.7	2.19214	0.05224	2.07561	0.3065	2.07561	23.4522	2.09784	269.2	1.7	271.5	2.2	298	12
GF-10	2252	68080	1.80304	0.05278	2.02887	0.3115	2.02887	23.3427	2.11146	270.4	1.8	275.3	1.9	319.3	7.7
GF-2	429	17480	3.53086	0.05196	2.09842	0.3073	2.09842	23.359	2.10423	270.2	1.7	272.1	1.9	283	15
GF-6	1409	64380	1.42036	0.05227	2.0154	0.3087	2.0154	23.3427	2.09695	270.4	1.7	273.2	1.6	297	5.7
GF-1	1689	55777.8	1.26992	0.05239	2.02615	0.3107	2.02615	23.2721	2.05344	271.2	1.2	274.7	1.5	302.2	7.3
GF-8	708.4	42891.7	1.74483	0.05305	2.06847	0.3188	2.06847	22.7998	2.10646	276.7	1.8	281	2.3	331	12
GF-11	468.3	18200	2.69603	0.05194	2.09849	0.3147	2.09849	22.7687	2.11343	277.1	1.9	277.8	2	282	15
GF-4	316.8	12435.3	2.83363	0.05234	2.16949	0.3175	2.16949	22.6757	2.1354	278.2	2	280	2.5	299	19
GF-3	505.3	13704.2	2.0375	0.0524	2.18418	0.3202	2.18418	22.6603	2.10519	278.4	1.8	282	2.7	302	20
GF-9	870	38941.2	1.47458	0.05186	2.04058	0.3154	2.04058	22.6501	2.15983	278.5	2.2	278.4	2.3	278.9	9.1
GF-13	729	30736.8	1.46386	0.05242	2.11463	0.3201	2.11463	22.5124	2.11095	280.2	1.9	281.9	2.4	306	15
GF-15	579	26555.6	2.20487	0.05165	2.03714	0.3262	2.03714	21.8245	2.14091	288.8	2.1	286.6	2	271.9	9.5
GF-12	520	22000	2.63959	0.05257	2.19073	0.3481	2.19073	20.79	2.58796	302.8	4.9	303.1	6.2	309	20
Sample LCP-1: (El Paso Mtns)
lcp-1-19	47.26	2162.5	3.15487	0.05377	2.69339	0.2729	2.69339	27.1887	2.15993	232.9	1.8	244.9	3.7	358	40
lcp-1-11	50.03	1740.87	2.2435	0.0591	4.07749	0.304	4.07749	26.7094	2.10022	237	1.5	269.6	8.6	558	73
lcp-1-31	42.8	1657.5	3.37806	0.0509	2.94455	0.261	2.94455	26.7523	2.07033	236.6	1.2	235.4	4.3	229	51
lcp-1-10	74.2	3307.22	4.46719	0.05122	2.78134	0.265	2.78134	26.6454	2.02977	237.48	0.81	238.6	4	246	45
lcp-1-30	74	3057.89	3.37591	0.05199	2.72206	0.269	2.72206	26.5322	2.03921	238.47	0.93	241.8	3.6	281	43
lcp-1-4	49	2246.11	2.04764	0.0515	2.92612	0.2678	2.92612	26.5393	2.0762	238.5	1.3	240.8	4.6	259	50
lcp-1-12	40.15	2107.33	2.74061	0.0506	2.95396	0.2628	2.95396	26.5534	2.07628	238.3	1.3	236.9	4.8	220	51
lcp-1-16	51.84	2194.44	3.44681	0.0514	2.92915	0.2668	2.92915	26.5252	2.0502	238.6	1	240.1	4.4	262	52
lcp-1-9	47.14	2368.75	2.61598	0.05234	2.7137	0.2717	2.7137	26.483	2.06895	238.9	1.2	244	4.2	296	43
lcp-1-27	50.09	1940.5	2.86556	0.05107	2.70484	0.2656	2.70484	26.5182	2.09093	238.6	1.4	239.1	4.3	240	42
lcp-1-5	52.8	2422.22	1.83972	0.05017	2.43859	0.2598	2.43859	26.5463	2.14305	238.4	1.8	234.5	2.9	201	32
lcp-1-23	68.1	2595	2.10836	0.05128	2.5852	0.2673	2.5852	26.5041	2.04446	238.77	0.98	240.5	3.4	250	38
lcp-1-32	36.4	1593.33	2.59075	0.0513	3.07762	0.2703	3.07762	26.476	2.09851	239	1.5	242.9	5	261	49
lcp-1-2	26.94	1065.71	2.82983	0.0518	3.84325	0.2677	3.84325	26.441	2.09042	239.3	1.4	240.7	6.7	269	73
lcp-1-15	47.7	2325.62	1.83532	0.05119	2.68887	0.2668	2.68887	26.455	2.04994	239.2	1	240.1	3.8	245	42
lcp-1-13	53.9	2115	1.85862	0.05168	2.63927	0.2692	2.63927	26.4201	2.06203	239.5	1.2	242	3.6	268	40
lcp-1-29	44.5	1928.33	2.78997	0.0514	3.2244	0.2684	3.2244	26.4201	2.04981	239.5	1.1	241.4	5	253	56
lcp-1-26	49.9	2407.5	2.92669	0.05172	2.62583	0.269	2.62583	26.4061	2.0557	239.6	1.1	241.9	4	270	39
lcp-1-1	63.07	3283.12	2.87466	0.05157	2.41712	0.2681	2.41712	26.4061	2.04414	239.6	1	241.9	3.1	271	33
lcp-1-14	39.72	1824.12	2.60288	0.0511	2.93834	0.2668	2.93834	26.3992	2.06194	239.7	1.2	240.1	4.3	242	47
lcp-1-6	69.1	3364.71	2.84714	0.05113	2.77014	0.2686	2.77014	26.3783	2.03381	239.88	0.88	241.5	4	262	38
lcp-1-20	38.35	1943.33	3.26939	0.0503	3.26797	0.2638	3.26797	26.3992	2.05568	239.7	1.1	237.6	5.6	204	60
lcp-1-28	40.5	2097.33	2.84211	0.0509	3.09162	0.267	3.09162	26.3644	2.0977	240	1.5	240.2	4.9	233	53
lcp-1-22	48.16	1667.73	2.94377	0.0508	2.80624	0.2675	2.80624	26.3644	2.02487	240.01	0.73	240.6	4.2	226	47
lcp-1-21	37.98	1690.59	2.55758	0.0524	2.76441	0.2742	2.76441	26.295	2.06799	240.6	1.2	246	4.7	301	45
lcp-1-18	45.64	2172.5	2.97911	0.0511	2.79815	0.2694	2.79815	26.3089	2.0494	240.5	1.1	242.2	4	243	46
lcp-1-7	48	1975	3.84924	0.05079	2.75184	0.266	2.75184	26.295	2.08944	240.6	1.5	240.3	4.1	227	43
lcp-1-8	31.96	1321.5	4.56571	0.0498	3.61558	0.2613	3.61558	26.2329	2.07448	241.2	1.3	235.5	6.4	178	66
lcp-1-25	34.4	1790	2.74541	0.0518	3.84325	0.2731	3.84325	26.1301	2.06715	242.1	1.3	245	7	266	74
lcp-1-17	71.7	3252.94	3.37571	0.05093	2.789	0.2723	2.789	26.0552	2.1034	242.8	1.5	244.5	3.5	242	47
lcp-1-3	50.8	2541.18	2.42366	0.05252	2.73529	0.281	2.73529	25.7732	2.07882	245.4	1.4	251.4	4.6	304	42
lcp-1-24	971	44470.6	6.74774	0.05129	2.05854	0.2757	2.05854	25.6739	2.05863	246.3	1.2	247.2	1.7	254	11
Sample MCPF: (El Paso Mtns)
MCPF-8	826	33161.1	1.61014	0.052	2.06155	0.2841	2.06155	25.1572	2.12891	251.3	1.8	253.9	2.1	285	11
MCPF-9	948	34100	1.15328	0.0515	2.02706	0.2821	2.02706	25.0564	2.14554	252.3	1.9	252.3	1.7	263.3	7.7
MCPF-15	782	29484.2	1.47798	0.05138	2.05834	0.2817	2.05834	25.0125	2.18321	252.7	2.2	252	2.4	260	11
MCPF-16	592.6	25323.5	1.4489	0.05157	2.14514	0.2831	2.14514	24.9501	2.20277	253.3	2.3	253.1	2.2	266	18
MCPF-11	588	28333.3	1.91469	0.05192	2.11055	0.288	2.11055	24.9066	2.17189	253.8	2.1	256.9	2.3	285	16
MCPF-12	928	42125	1.23899	0.05158	2.03022	0.2854	2.03022	24.8509	2.07338	254.3	1.4	254.9	1.2	266.6	8
MCPF-10	602	27125	1.70974	0.05158	2.06737	0.287	2.06737	24.7341	2.16014	255.5	2.1	256.1	2.3	271	12
MCPF-4	600.6	26164.7	2.06392	0.05175	2.08232	0.289	2.08232	24.6548	2.14106	256.3	1.9	258.2	2.5	274	13
MCPF-13	944	38333.3	1.81399	0.05213	2.05231	0.2907	2.05231	24.6245	2.16817	256.6	2.1	259.1	2.3	291	10
MCPF-23	561	24500	3.26163	0.05197	2.09264	0.2914	2.09264	24.6184	2.5309	256.7	3.9	259.6	3.9	286	15
MCPF-20	390	12466.7	2.30224	0.05255	2.08519	0.294	2.08519	24.57	2.0922	257.1	1.5	261.7	1.7	309	13
MCPF-1	274.8	9742.86	2.48014	0.05157	2.14514	0.2911	2.14514	24.5098	2.09176	257.8	1.5	259.4	2.4	270	19
MCPF-14	426.9	22642.9	2.4187	0.05149	2.09433	0.2898	2.09433	24.4499	2.21568	258.4	2.4	258.3	2.7	262	14
MCPF-21	864	45000	2.32009	0.05187	2.04448	0.2951	2.04448	24.3843	2.15581	259.1	2	262.6	1.9	281.2	9.8
MCPF-7	813	37481.2	1.55777	0.05172	2.05758	0.2935	2.05758	24.3427	2.14634	259.5	2	261.3	2.1	273	11
MCPF-18	460.6	19638.9	1.14293	0.05262	2.10178	0.2993	2.10178	24.1897	2.14457	261.1	2	265.8	2.5	312	15
MCPF-6	643	28850	12.5097	0.05521	2.09807	0.3758	2.09807	20.2143	2.13527	311.3	2.3	323.9	2.5	420	14
MCPF-2	353	23611.1	2.50355	0.0554	2.09741	0.522	2.09741	14.6199	3.30533	426	11	426	11	428	14
MCPF-5	331	29235.3	30.9346	0.0791	4.28769	0.94	4.28769	11.8064	7.81628	523	38	662	55	1172	77
MCPF-19	740	73470.6	0.770833	0.05946	2.0509	0.745	2.0509	11.0132	2.3972	560.4	7.4	565.3	6.7	583.9	9.7
MCPF-3	474.3	31351.4	2.75436	0.08009	2.08084	1.479	2.08084	7.44602	3.46497	812	22	920	19	1199	11
MCPF-22	121.5	31286.7	1.30505	0.10514	2.04139	2.927	2.04139	4.92126	2.29808	1192	12	1390.3	9.1	1718.2	8
MCPF-17	343.7	123714	1.5262	0.19724	2.02864	11.12	2.02864	2.44918	2.31992	2207	22	2533	13	2803.4	5.5
Sample PWM-1CA: (El Paso Mtns)
PWM-1 CA-1	242	8608.7	1.56129	0.05136	2.2159	0.2889	2.2159	24.7158	2.67708	255.7	4.5	257.6	5.2	260	21
PWM-1 CA-10	118.69	4757.14	4.20887	0.05132	2.09495	0.2914	2.09495	24.4379	2.18495	258.5	2.3	259.6	2.9	255	14
PWM-1 CA-11	111.5	5327.78	2.52834	0.05161	2.395	0.2943	2.395	24.2483	2.12002	260.5	1.8	261.9	3	266	30
PWM-1 CA-12	169	9266.67	1.69	0.05107	2.33962	0.2842	2.33962	24.8139	2.24389	254.7	2.6	254	3.1	242	28
PWM-1 CA-13	127.6	6050	2.43048	0.0514	2.25914	0.2915	2.25914	24.3427	2.34124	259.5	3.1	259.7	3.2	258	24
PWM-1 CA-14	110.3	8600	2.29505	0.051	2.44808	0.2889	2.44808	24.432	2.226	258.6	2.5	257.6	4.4	245	34
PWM-1 CA-15	126	5335	2.71259	0.05126	2.42174	0.2886	2.42174	24.6914	2.10819	255.9	1.7	257.4	3.7	250	32
PWM-1 CA-16	147	7305.88	2.05021	0.05052	2.36746	0.2847	2.36746	24.6427	2.31116	256.5	2.9	254.9	3	222	28
PWM-1 CA-17	140.3	5304.35	1.9929	0.05129	2.23355	0.2876	2.23355	24.6366	2.5017	256.5	3.8	256.6	3.8	252	23
PWM-1 CA-18	88.3	5371.43	3.07666	0.05193	2.52453	0.2921	2.52453	24.5881	2.21801	257	2.4	260.2	3.5	280	35
PWM-1 CA-19	89	4238.89	2.72839	0.05098	2.56655	0.285	2.56655	24.6184	2.25147	256.7	2.6	254.6	4.7	237	37
PWM-1 CA-2	95.8	3019.23	2.89689	0.05136	2.64629	0.2882	2.64629	24.7525	2.18953	255.3	2.2	257.1	5.1	253	40
PWM-1 CA-20	85.6	4072.22	4.27786	0.05222	2.50772	0.2967	2.50772	24.4618	2.3192	258.3	3	263.8	4.3	292	35
PWM-1 CA-21	156	7929.41	1.87726	0.05065	2.26642	0.2864	2.26642	24.6245	2.73904	256.6	4.7	255.7	4.7	224	24
PWM-1 CA-22	200	10843.8	2.28571	0.05139	2.19919	0.2922	2.19919	24.3605	2.22475	259.3	2.5	260.2	3.1	258	21
PWM-1 CA-23	204	9473.68	1.71429	0.05127	2.2251	0.2894	2.2251	24.6488	2.62538	256.3	4.3	258	4.8	252	22
PWM-1 CA-24	154.2	10515.4	3.33045	0.05081	2.20355	0.2884	2.20355	24.5218	2.35882	257.6	3.2	257.3	2.8	235	21
PWM-1 CA-3	97.1	4200	2.90719	0.0511	2.44648	0.2831	2.44648	24.82	2.49354	254.6	3.7	253.1	4.4	249	34
PWM-1 CA-4	158.3	8100	2.29753	0.0512	2.27023	0.2833	2.27023	25.0501	2.32081	252.3	2.9	253.2	3.5	249	25
PWM-1 CA-5	169	8312.5	1.96512	0.05108	2.30958	0.2966	2.30958	23.7304	2.79043	266.1	5.1	264.7	5.1	243	27
PWM-1 CA-6	137.2	6852.94	1.94334	0.0512	2.31804	0.292	2.31804	24.5519	2.441	257.4	3.5	260.1	3.8	248	27
PWM-1 CA-7	142.4	6917.65	2.52482	0.05122	2.37916	0.2868	2.37916	24.8262	2.20086	254.6	2.3	256	3.4	254	28
PWM-1 CA-8	126.1	5772.22	2.77265	0.05061	2.44297	0.2798	2.44297	25.0438	2.25973	252.4	2.6	250.5	3.7	221	33
PWM-1 CA-9	126.5	7333.33	2.32965	0.05101	2.44792	0.2969	2.44792	23.9636	2.19755	263.5	2.4	263.9	4.4	239	33
Sample PWM-2: (El Paso Mtns)
pwm-2-1	150.2	14094.7	2.28789	0.05154	2.30444	0.3006	2.30444	23.7417	2.06121	265.9	1.3	266.8	3	269	25
pwm-2-10	221.4	11147.1	2.49044	0.05172	2.15138	0.2905	2.15138	24.5038	2.02521	257.85	0.81	258.9	2	272	18
pwm-2-11	255.9	11410.5	2.24868	0.05127	2.2251	0.2854	2.2251	24.777	2.02986	255.06	0.87	255.3	1.8	252	22
pwm-2-12	293	13916.7	2.69549	0.05162	2.17406	0.2903	2.17406	24.4439	2.03333	258.48	0.91	258.8	1.8	268	20
pwm-2-13	378	9342.86	1.60169	0.0526	3.17934	0.2986	3.17934	24.3013	2.12873	260	1.9	265.1	6.5	306	49
pwm-2-14	199.4	11200	3.11855	0.05123	2.15418	0.2884	2.15418	24.57	2.05376	257.2	1.2	257.2	2.4	251	18
pwm-2-15	450	31583.3	1.45161	0.05119	2.10133	0.2858	2.10133	24.5399	2.14864	257.5	2	255.2	2.1	249	15
pwm-2-16	139.7	8478.57	2.16589	0.05105	2.28108	0.2895	2.28108	24.1955	2.0966	261.1	1.6	258.2	2.7	242	25
pwm-2-17	185.9	8633.33	2.41178	0.05128	2.28813	0.2899	2.28813	24.3724	2.04755	259.2	1.1	258.5	2.5	252	25
pwm-2-18	354	16366.7	3.08685	0.05103	2.08461	0.2871	2.08461	24.4081	2.0773	258.9	1.4	256.3	1.9	245	15
pwm-2-19	256.5	13168.8	1.87637	0.05127	2.16127	0.2869	2.16127	24.6245	2.04334	256.6	1	256.1	2.1	256	20
pwm-2-2	160.6	8631.25	2.5696	0.052	2.19475	0.2907	2.19475	24.6488	2.02551	256.35	0.83	259.1	2.2	284	21
pwm-2-20	373	20400	1.69545	0.05103	2.12737	0.2879	2.12737	24.4499	2.09132	258.4	1.5	256.9	1.7	244	16
pwm-2-21	231.5	14453.8	2.40845	0.05143	2.13212	0.29	2.13212	24.4858	2.04286	258	1	258.5	1.8	259	17
pwm-2-22	191.5	9825	2.21157	0.05299	2.22778	0.301	2.22778	24.2014	2.04689	261	1.1	267.1	2.1	327	22
pwm-2-23	231.8	13242.9	2.10919	0.0513	2.21638	0.2869	2.21638	24.5278	2.03814	257.6	1	256.1	2	258	21
pwm-2-24	456.2	27738.5	1.45287	0.05096	2.06899	0.2851	2.06899	24.6305	2.04336	256.5	1.1	254.7	1.6	239	12
pwm-2-3	340.5	19560	2.00767	0.05143	2.1989	0.2868	2.1989	24.6975	2.02561	255.89	0.78	256	1.8	263	22
pwm-2-4	161.3	11775	2.17885	0.05178	2.22937	0.2945	2.22937	24.108	2.04156	262	1.1	262.1	2.5	275	22
pwm-2-5	374.3	20143.8	1.36956	0.05179	2.13707	0.2902	2.13707	24.5038	2.04292	257.9	1	258.7	1.7	276	17
pwm-2-6	332	22307.7	1.87571	0.05169	2.10539	0.294	2.10539	24.1546	2.04172	261.5	1.1	261.7	1.7	271	15
pwm-2-7	310	7566.67	2.45059	0.0552	2.82331	0.3189	2.82331	24.0385	2.20882	262.7	2.4	280.9	6	417	44
pwm-2-8	262.8	17623.1	3.06687	0.05179	2.15816	0.2944	2.15816	24.2483	2.04204	260.5	1	262	2.3	275	19
pwm-2-9	274.5	16792.9	1.66062	0.05165	2.10555	0.2885	2.10555	24.667	2.01832	256.19	0.66	257.3	1.3	269	15
Sample TRBS-1: (El Paso Mtns)
trbs-1-18	424	13583.3	11.5186	0.0587	2.98407	0.2715	2.98407	29.9133	2.42763	212	2.8	243.8	4.4	559	50
trbs-1-3	91.6	3427.27	1.27222	0.05133	2.25981	0.2687	2.25981	26.3366	2.05542	240.3	1.1	241.6	2.7	254	25
trbs-1-11	101.6	6792.31	1.30759	0.05155	2.51963	0.2711	2.51963	26.2261	2.03832	241.23	0.92	243.5	3.7	263	35
trbs-1-23	238.2	17425	1.22342	0.05081	2.28358	0.2676	2.28358	26.2123	2.02458	241.36	0.77	240.8	2.4	231	25
trbs-1-15	123.2	6264.71	1.42428	0.05118	2.2522	0.2693	2.2522	26.1029	2.04314	242.33	0.97	242.7	2.6	248	24
trbs-1-21	235.8	13075	2.14559	0.05133	2.20782	0.2711	2.20782	26.0593	2.01591	242.74	0.6	243.5	2	255	22
trbs-1-17	139.6	6165	1.69007	0.0514	2.2775	0.272	2.2775	25.9875	2.02833	243.43	0.81	244.3	2.4	258	25
trbs-1-2	148.1	10175	1.27234	0.05088	2.26416	0.2693	2.26416	25.9875	2.03282	243.38	0.85	242.1	2.3	234	25
trbs-1-9	140.1	8642.86	1.29459	0.05093	2.4492	0.2693	2.4492	25.9808	2.03281	243.48	0.89	242.1	2.8	235	32
trbs-1-19	158.5	9992.86	1.15273	0.05121	2.16912	0.2722	2.16912	25.9538	2.02826	243.7	0.82	244.5	2	250	19
trbs-1-20	203.4	9542.11	1.46965	0.05376	2.63222	0.2864	2.63222	25.8598	2.04235	244.57	0.99	255.7	4.4	358	37
trbs-1-10	308.2	17840	2.41915	0.05095	2.07413	0.2705	2.07413	25.9135	2.02021	244.11	0.66	243.1	1.4	241	14
trbs-1-22	81.3	3625	1.35252	0.05094	2.59214	0.2712	2.59214	25.8866	2.03735	244.34	0.96	243.6	3.5	235	38
trbs-1-4	234.7	13026.7	1.11074	0.05033	2.21575	0.2674	2.21575	25.8799	2.03255	244.39	0.9	240.6	2	209	22
trbs-1-24	181.6	7313.64	4.98901	0.05099	2.18606	0.2733	2.18606	25.7666	2.14418	245.4	1.9	245.3	2.5	240	20
trbs-1-12	68.7	4040	2.41307	0.0519	2.52507	0.2774	2.52507	25.7268	2.02777	245.8	0.8	248.5	3.7	278	35
trbs-1-8	111.4	5000	2.00324	0.05123	2.29821	0.275	2.29821	25.7334	2.03691	245.78	0.94	246.6	2.2	255	27
trbs-1-14	104.3	5388.24	1.70984	0.05061	2.33511	0.2717	2.33511	25.7268	2.04192	245.8	0.99	244	3.1	228	30
trbs-1-5	147.5	6605.26	1.59805	0.05093	2.24554	0.2727	2.24554	25.7069	2.02365	246	0.76	244.8	2.2	236	24
trbs-1-13	77.07	4023.53	1.38865	0.05149	2.4742	0.2783	2.4742	25.6016	2.25872	247	2.6	249.2	4.2	260	33
trbs-1-16	103.1	5447.06	1.58689	0.0576	4.77891	0.309	4.77891	25.3807	2.05732	249.1	1.2	276	11	492	92
trbs-1-7	130.8	5342.86	1.75641	0.05133	2.2876	0.2782	2.2876	25.5558	2.04664	247.4	1.1	249.2	2.5	254	26
trbs-1-6	204.4	9342.11	1.31362	0.05088	2.23712	0.2777	2.23712	25.2334	2.04034	250.53	0.99	248.8	2.4	234	23
trbs-1-1	405	20411.8	2.24875	0.05111	2.08435	0.284	2.08435	24.8077	2.11719	254.7	1.7	253.8	2.3	248	14
Sample TRBS-2: (El Paso Mtns)
TRBS2-12	88.2	1762.86	2.78321	0.0485	2.8725	0.1538	2.8725	43.956	2.47065	145	2.1	145.2	3.7	122	48
TRBS2-22	218	6337.5	2.10019	0.05121	2.19246	0.2624	2.19246	26.9978	2.57371	234.4	3.7	236.5	4.3	249	21
TRBS2-7	72	2766.67	2.88693	0.04986	2.57666	0.2573	2.57666	27.0416	2.16858	234.1	2	232.5	3.3	185	38
TRBS2-15	760	26100	1.89526	0.05106	2.0501	0.2618	2.0501	26.9542	2.78681	234.8	4.5	236	4.3	243	10
TRBS2-18	43.9	1276.67	2.89578	0.0498	2.97976	0.2581	2.97976	26.9179	2.53722	235.1	3.6	234.3	5.9	182	50
TRBS2-4	72.5	2295.45	3.11159	0.05261	2.69457	0.2701	2.69457	26.7094	2.43496	236.9	3.2	242.7	4.1	308	42
TRBS2-20	151.5	4608.7	3.2842	0.05111	2.29952	0.2652	2.29952	26.7308	2.39073	236.7	3	238.8	3.8	244	26
TRBS2-13	53.3	1418.46	2.45509	0.0511	2.79815	0.2689	2.79815	26.7308	2.36187	236.7	2.9	241.8	5	253	42
TRBS2-2	71	1818.52	3.57683	0.0504	2.96032	0.262	2.96032	26.7237	2.42023	236.8	3.2	236.2	5.2	211	48
TRBS2-1	57.9	1564.23	2.95861	0.0503	3.11312	0.2648	3.11312	26.5041	2.42888	238.7	3.2	238.4	5.9	217	56
TRBS2-14	61.05	1738	2.08861	0.0514	2.92915	0.2716	2.92915	26.3505	2.53318	240.1	3.7	243.8	6.1	260	46
TRBS2-5	157.8	4691.67	1.17236	0.05099	2.22745	0.2675	2.22745	26.3158	2.3243	240.4	2.8	240.6	3.4	239	22
TRBS2-11	48.4	1734.5	3.40605	0.0504	2.96032	0.2687	2.96032	26.3227	2.33798	240.4	2.8	241.6	4.7	222	52
TRBS2-16	53.01	1501.6	2.87161	0.0511	3.23606	0.2693	3.23606	26.295	2.32382	240.6	2.8	242	6.3	250	61
TRBS2-23	2000	59625	5.07614	0.05155	2.02701	0.2723	2.02701	26.1438	2.29429	241.9	2.7	244.5	2.6	265.4	7.4
TRBS2-9	411	15105.3	2.85417	0.05144	2.13888	0.2704	2.13888	26.0146	2.48974	243.1	3.6	242.9	3.2	260	17
TRBS2-3	190.7	7627.78	1.75599	0.05152	2.15251	0.2753	2.15251	25.9	2.36867	244.2	3	246.9	2.5	263	18
TRBS2-6	145.9	4445.83	3.02886	0.05042	2.2974	0.2728	2.2974	25.6871	2.3631	246.2	3.1	244.9	4.2	213	26
TRBS2-8	77	2577.27	2.92776	0.0518	2.77972	0.2828	2.77972	25.2653	2.46454	250.2	3.5	252.8	5.3	271	44
TRBS2-17	487	18100	2.48469	0.05113	2.08429	0.2793	2.08429	25.1446	2.80118	251.4	4.8	250	4.4	246	13
TRBS2-24	195	6990.48	2.71588	0.05121	2.20875	0.2837	2.20875	24.9252	2.3969	253.6	3.3	253.6	3.4	249	21
TRBS2-10	515	18428.6	2.37327	0.05147	2.10026	0.2872	2.10026	24.8756	3.38931	254.2	6.6	256.2	6	261	15
TRBS2-19	408	16888.9	2.93525	0.05126	2.1921	0.2857	2.1921	24.8756	3.59314	254.2	7.2	254.9	7.1	252	21
TRBS2-21	212	6956.52	3.41935	0.05136	2.25952	0.2913	2.25952	24.3309	3.53902	259.6	7.3	259.4	7	256	24
Sample MCP-1: (El Paso Mtns)
MCP-1-1	305	1227.91	3.43856	0.05109	2.33938	0.2954	2.43442	23.8777	2.08048	264.5	1.5	262.8	3.2	243	28
MCP-1-10	252.5	814.953	3.86677	0.05205	2.39945	0.297	2.37424	24.1255	2.05738	261.8	1.3	264	3	285	31
MCP-1-11	267.8	1338.24	2.98551	0.05188	2.43435	0.2917	2.46437	24.5038	2.04806	257.9	1.1	259.9	3.3	278	32
MCP-1-12	171	1033.33	3.6	0.05247	2.44725	0.3005	2.53895	24.0674	2.17015	262.4	2.2	266.7	3.7	304	32
MCP-1-14	294	4175	2.91667	0.052	2.24473	0.2939	2.2611	24.432	2.06476	258.6	1.3	261.6	2.4	284	23
MCP-1-15	309	6980	3.00876	0.05144	2.24096	0.2853	2.29304	24.888	2.07359	253.9	1.4	254.8	2.5	264	22
MCP-1-16	186.6	1041.67	3.92842	0.05142	2.39768	0.2857	2.36384	24.82	2.06068	254.6	1.2	255.2	2.9	258	30
MCP-1-17	301.7	2044	1.91921	0.05161	2.32314	0.2914	2.33295	24.4978	2.04803	257.9	1.1	259.7	2.7	266	28
MCP-1-18	256.1	1440	3.02361	0.05148	2.42943	0.2885	2.51516	24.7219	2.04891	255.6	1.1	257.3	3.5	260	32
MCP-1-19	508	13384.6	2.36279	0.05161	2.14492	0.29	2.20609	24.5098	2.0592	257.8	1.3	258.5	2.1	271	19
MCP-1-2	499	6676.92	2.6585	0.05189	2.14341	0.2995	2.38656	23.9751	2.1508	263.4	2	266	3.1	280	18
MCP-1-3	111.1	1218.75	3.41007	0.0512	2.93527	0.2975	3.0881	23.7248	2.10008	266.2	1.7	264.4	5.5	244	50
MCP-1-4	184.6	2200	3.89451	0.05188	2.58541	0.2955	2.53442	24.2895	2.05256	260.1	1.2	262.8	3.6	277	38
MCP-1-5	296	3150	2.09929	0.05174	2.31188	0.2928	2.2957	24.3843	2.0377	259.07	0.98	260.7	2.6	278	25
MCP-1-6	316.6	2900	2.59934	0.05164	2.23919	0.291	2.1905	24.4978	2.09897	257.9	1.6	259.4	2	268	23
MCP-1-7	341.9	4407.69	3.10818	0.05136	2.23294	0.2851	2.18379	24.7893	2.03427	254.91	0.93	254.7	2	256	23
MCP-1-8	551	10882.4	2.18998	0.05205	2.12908	0.2898	2.17812	24.7954	2.04919	254.9	1.1	258.4	2	287	17
MCP-1-9	281	2494.87	2.90589	0.051	2.18599	0.2888	2.12808	24.3724	2.0289	259.21	0.9	257.6	1.7	240	20
Sample LM-4: (Lane Mountain)
LM4-10	124	1016.67	2.90398	0.0482	3.35773	0.1666	3.40935	40.783	2.09147	156.14	0.93	156.4	4	112	61
LM4-11	593	1361.25	3.0071	0.04908	2.36554	0.1541	2.42014	44.1833	2.03255	144.28	0.52	145.6	1.8	150	30
LM4-12	444	6423.08	3.41014	0.04871	2.43903	0.1566	2.4441	43.1351	2.02531	147.74	0.47	147.7	2	126	34
LM4-13	438	1378.33	1.4698	0.04922	2.40792	0.156	2.52326	43.7139	2.03749	145.81	0.56	147.2	2.1	156	31
LM4-14	416.8	975	2.71354	0.04932	2.19829	0.1565	2.2178	43.6167	2.03096	146.13	0.51	147.6	1.3	162	21
LM4-15	84.5	328.4	1.38525	0.0503	4.27414	0.1669	4.16631	41.7014	2.12193	152.7	1.1	156.7	5.4	203	81
LM4-16	168.6	355.556	1.52304	0.0487	3.01693	0.1574	3.18423	42.8633	2.10081	148.65	0.93	148.4	3.4	132	52
LM4-17	2690	9140.35	1.11943	0.04895	2.05445	0.1589	2.18547	42.6985	2.10005	149.25	0.93	149.7	1.2	145	11
LM4-18	163	1113.79	2.85464	0.0488	3.49719	0.1664	4.17595	40.5351	2.65294	157.1	2.7	156.2	5.3	139	62
LM4-19	252.7	2695	2.98347	0.04901	2.7852	0.1582	3.17449	42.7533	2.17512	149	1.3	149.1	3.4	146	44
LM4-2	168	1046.67	2.6209	0.0494	3.30533	0.1614	3.38111	42.3191	2.06347	150.55	0.78	151.8	3.9	165	57
LM4-20	830	16600	2.23118	0.04867	2.27725	0.1731	3.56097	39.2003	3.42729	162.4	4.4	162	4.4	131	26
LM4-21	339	4807.14	1.93714	0.04862	2.29775	0.161	2.26162	41.5973	2.16613	153.1	1.3	151.6	1.5	133	28
LM4-22	395.1	3780	2.1151	0.04853	2.7275	0.1556	2.73378	43.0293	2.06558	148.09	0.73	146.8	2.5	124	42
LM4-23	245	475000	2.46479	0.04976	2.50435	0.1609	2.53262	42.6076	2.04488	149.57	0.64	151.5	2.2	189	37
LM4-24	349.5	3345	2.61798	0.04915	2.32219	0.1572	2.33684	43.1611	2.0326	147.65	0.53	148.2	1.7	153	27
LM4-25	98.7	38840	3.15335	0.0495	3.14276	0.1631	3.35824	41.9992	2.20312	151.7	1.4	153.3	3.9	170	53
LM4-3	295.4	5454	3.00509	0.04894	2.49498	0.1564	2.60069	43.1406	2.10208	147.69	0.94	147.6	2.3	142	35
LM4-4	84.7	1235.38	2.09653	0.0477	3.55166	0.156	3.72371	42.5351	2.14154	149.8	1.1	147.1	4.3	86	63
LM4-5	591	6943.75	3.42609	0.04893	2.17642	0.1585	2.24032	42.6967	2.01634	149.24	0.38	149.3	1.4	143	20
LM4-6	687	4356.67	2.27408	0.04905	2.19196	0.1622	2.25798	41.9815	2.138	151.8	1.1	152.6	1.5	153	20
LM4-7	423	3865	2.47658	0.04905	2.2636	0.1554	2.27963	43.7178	2.02813	145.8	0.48	146.7	1.5	149	25
LM4-8	98.9	968	1.82136	0.0483	3.03096	0.1636	3.20634	41.0341	2.24775	155.2	1.6	154.7	3.2	115	51
LM4-9	70.1	1289.09	1.90489	0.0494	3.80661	0.1663	3.86498	40.6504	2.24339	156.7	1.6	157.3	5.1	150	74
LM4-1	231.4	1166.67	2.54007	0.04872	2.58772	0.1548	2.74036	43.4216	2.07813	146.76	0.8	146.1	2.6	132	38
Sample LM-1: (Lane Mountain)
LM1-17	253	456	3.05187	0.04995	2.5009	0.1592	2.39583	43.3839	2.06665	146.93	0.73	150	1.8	197	33
LM1-14	167.3	307	2.57385	0.04975	2.7376	0.1597	2.78712	42.517	2.06405	149.85	0.76	151	2.5	179	44
LM1-10	362	2232.26	2.75495	0.0495	2.37062	0.1666	2.33263	41.0172	2.06986	155.29	0.81	156.4	1.7	176	31
LM1-13	271	709	1.85744	0.05025	2.61941	0.225	5.28216	31.0559	5.06957	204.1	9.4	205.8	8.9	203	39
LM1-9	787	2969.62	2.41931	0.05144	2.09451	0.2673	2.17724	26.5182	2.07608	238.6	1.3	240.5	1.8	260	14
LM1-16	930	25218.2	6.86854	0.05131	2.10087	0.269	2.20539	26.3922	2.10603	239.8	1.6	241.9	2	254	15
LM1-8	428	11809.1	1.41534	0.05082	2.24655	0.2692	2.36541	25.974	2.08003	243.5	1.4	242	2.8	231	24
LM1-3	256	895.556	2.23581	0.05112	2.43496	0.277	2.64628	25.3807	2.12251	249.1	1.7	248.2	3.8	244	33
LM1-18	229.7	79000	2.77081	0.05133	2.48842	0.2775	2.46531	25.4777	2.05775	248.2	1.2	248.7	3.2	253	34
LM1-22	227	7180	2.31397	0.05079	2.68517	0.2805	2.77599	24.9813	2.05555	253	1.2	251	4.3	228	42
LM1-2	223.1	1394	2.22655	0.05162	2.23072	0.2806	2.30229	25.2207	2.06263	250.7	1.2	251.1	2.6	267	23
LM1-7	757	16728.6	1.1035	0.05168	2.06711	0.2807	2.11144	25.2462	2.04553	250.4	1	251.2	1.5	274	13
LM1-23	213	1111.67	4.18468	0.05177	2.28304	0.2849	2.40396	24.9563	2.12692	253.3	1.8	254.5	3	274	25
LM1-19	335.9	46347.8	1.99347	0.05093	2.21938	0.2851	2.21289	24.6914	2.06612	255.9	1.3	254.6	2.2	241	23
LM1-21	318	9910	4.18972	0.05158	2.19779	0.285	2.24397	25.025	2.05574	252.6	1.2	254.6	2.3	266	21
LM1-11	158.2	684.286	2.7323	0.05315	2.63276	0.2854	2.90168	25.7931	2.11778	245.2	1.7	254.9	4.7	332	39
LM1-12	651.2	7869.23	1.59218	0.05205	2.09236	0.2854	2.40266	25.1319	2.2056	251.5	2.3	254.9	3	287	14
LM1-4	921	15368.4	2.37371	0.05166	2.0826	0.2859	2.19705	24.8447	2.08699	254.4	1.5	255.3	2	270	13
LM1-24	229.8	816.667	2.17202	0.05121	2.52583	0.2863	2.54371	24.8509	2.05498	254.3	1.2	255.6	3.5	254	37
LM1-6	307	9830	3.66348	0.05096	2.19427	0.2864	2.24172	24.42	2.12995	258.7	1.8	255.7	2.3	238	21
LM1-25	176.4	2100	3.00511	0.05087	2.56873	0.2873	2.65119	24.4439	2.07104	258.5	1.4	256.4	4	232	38
LM1-15	273	7225	2.64535	0.05133	2.25981	0.2874	2.58348	24.7036	2.21996	256.3	2.3	256.5	3.7	259	23
LM1-20	288	1153.75	3.23596	0.05149	2.36508	0.289	2.3381	24.6975	2.07249	255.9	1.4	257.8	2.7	261	29
LM1-1	175.5	3693.33	2.40741	0.05265	2.52326	0.2903	2.53039	24.9128	2.11008	253.7	1.7	258.8	3.6	311	34
LM1-5	292	9500	2.45585	0.05195	2.41156	0.2931	2.40219	24.3072	2.07026	259.9	1.4	261.6	3.2	281	31
LM1-26	212.5	2958.33	3.33595	0.05153	2.34408	0.3027	2.492	23.4687	2.27276	269	2.8	268.5	3.5	263	28
Sample FPG-1: (Fremont Peak)
FPG-1 CA-1	137.4	5430.43	1.49348	0.05172	2.51657	0.3044	2.51657	23.8209	2.14034	265.1	2	269.8	3.6	270	35
FPG-1 CA-10	263.4	8621.43	11.7275	0.05127	2.15395	0.1433	2.15395	49.505	2.37838	128.9	1.6	136	1.8	252	18
FPG-1 CA-11	114.3	5475	2.19344	0.05192	2.19533	0.3055	2.19533	23.546	2.30893	268.1	3	270.6	3.2	281	21
FPG-1 CA-12	122.8	7766.67	2.30006	0.05127	2.30744	0.3059	2.30744	23.5405	2.30879	268.2	3	271	4.1	257	26
FPG-1 CA-13	175.5	10681.2	3.6208	0.0516	2.23089	0.3101	2.23089	22.9621	2.17297	274.8	2.3	274.3	3.2	266	23
FPG-1 CA-14	814	40421.1	26.4629	0.05139	2.04132	0.3009	2.04132	23.5682	2.16343	267.9	2.2	267.1	2.6	258.2	9.5
FPG-1 CA-15	122.9	7826.67	1.93604	0.05108	2.30958	0.3025	2.30958	23.3318	2.18771	270.5	2.3	268.3	3.5	243	27
FPG-1 CA-16	100.5	4662.5	2.82621	0.05128	2.4549	0.3001	2.4549	23.7473	2.2349	265.9	2.6	266.4	3.8	263	33
FPG-1 CA-17	139.4	8486.67	2.04399	0.0514	2.3256	0.3045	2.3256	23.4522	2.18013	269.1	2.3	269.9	3.2	262	29
FPG-1 CA-18	135.3	7188.24	1.53401	0.05133	2.2246	0.3058	2.2246	23.1696	2.17599	272.4	2.3	270.8	3.9	259	21
FPG-1 CA-19	221	9145.45	3.49021	0.05127	2.11968	0.3073	2.11968	23.1857	2.3353	272.2	3.2	272.1	3.2	253	16
FPG-1 CA-2	108.1	4704.76	2.00557	0.05162	2.41638	0.3025	2.41638	23.6462	2.22259	267	2.5	269.2	4.7	266	31
FPG-1 CA-20	171.2	12625	1.3751	0.0521	2.24385	0.3074	2.24385	23.5018	2.28475	268.6	2.9	272.1	2.8	289	23
FPG-1 CA-21	167.9	8705.88	2.22827	0.05125	2.17648	0.3066	2.17648	23.1374	2.26556	272.8	2.8	271.5	3	251	20
FPG-1 CA-22	130.4	6658.82	2.04389	0.0518	2.15093	0.3054	2.15093	23.3809	2.21787	270	2.5	270.6	3.1	276	18
FPG-1 CA-23	188.6	9570.59	1.36469	0.0515	2.23174	0.3031	2.23174	23.3481	2.11151	270.3	1.8	269.4	3.1	262	23
FPG-1 CA-24	80.7	4600	2.43292	0.05172	2.4258	0.3101	2.4258	23.1965	2.27785	272.1	2.9	274.2	4.1	278	29
FPG-1 CA-25	261.4	12150	10.199	0.05101	2.17808	0.2962	2.17808	23.7756	2.16621	265.6	2.2	263.4	2.8	240	20
FPG-1 CA-3	96.1	4734.21	2.38817	0.05056	2.47834	0.3003	2.47834	23.4577	2.17098	269.1	2.2	266.6	3.5	218	34
FPG-1 CA-4	97.4	5423.53	2.11005	0.05129	2.317	0.3061	2.317	23.2396	2.21537	271.6	2.5	271.1	3.3	257	25
FPG-1 CA-5	114.7	5784.21	2.28942	0.05129	2.3269	0.306	2.3269	23.2721	2.15083	271.2	2.1	271.1	3.2	252	27
FPG-1 CA-6	86.7	4352.63	2.18004	0.05232	2.42771	0.315	2.42771	23.068	2.23247	273.6	2.7	278	4.3	297	31
FPG-1 CA-7	433	15310.5	6.77621	0.05065	2.13609	0.2127	2.13609	33.1126	4.15535	191.9	7.1	195.6	6.9	224	17
FPG-1 CA-8	128.4	5909.52	2.30438	0.05074	2.20409	0.3042	2.20409	23.2072	2.15865	272	2.1	269.7	3.2	228	22
FPG-1 CA-9	124.8	6561.11	2.10455	0.05152	2.35439	0.2975	2.35439	23.9063	2.36757	264.1	3.3	264.4	3.7	268	30

## Sheet: zircon Hf data
Analysis	176Hf/177Hf	2σ	176Lu/177Hf	2σ	176Hf/177Hf (T)	EHf (0)	err	EHf(T)	Age
Sample LCP-2: (El Paso Mtns)
15EPM20-1	0.282892	8.8e-05	0.0011	0.00011	0.282887	3.78379	1.55595	9.06647	245.403
15EPM20-10	0.282967	9.6e-05	0.00113	4.7e-05	0.282962	6.43598	1.6974	11.7264	245.919
15EPM20-11	0.282926	9.6e-05	0.001031	2.6e-05	0.282921	4.98612	1.6974	10.1324	238.549
15EPM20-12	0.282944	8.7e-05	0.000562	6.9e-06	0.282941	5.62265	1.53827	10.9955	245.484
15EPM20-13	0.282909	7.1e-05	0.001029	1.8e-05	0.282904	4.38496	1.25537	9.85555	253.54
15EPM20-14	0.282899	9.6e-05	0.001534	6.7e-05	0.282892	4.03133	1.6974	9.03516	235.615
15EPM20-15	0.282918	8e-05	0.001873	3.2e-05	0.28291	4.70322	1.4145	9.68259	236.947
15EPM20-16	0.282923	9.6e-05	0.000997	3e-05	0.282919	4.88003	1.6974	10.0333	238.627
15EPM20-17	0.282946	9.8e-05	0.000885	1e-05	0.282942	5.69337	1.73277	11.068	247.978
15EPM20-18	0.282817	9.3e-05	0.000757	1.5e-05	0.282814	1.1316	1.64436	6.39945	242.234
15EPM20-19	0.282962	7.9e-05	0.000621	3.6e-05	0.282959	6.25917	1.39682	11.6151	245.135
15EPM20-2	0.282935	9.6e-05	0.000865	5.6e-05	0.282931	5.30438	1.6974	10.5391	241.402
15EPM20-20	0.282857	8.9e-05	0.001059	2.4e-05	0.282852	2.5461	1.57363	7.71336	239.785
15EPM20-21	0.282934	8.7e-05	0.001416	3.8e-05	0.282927	5.26902	1.53827	10.7836	258.609
15EPM20-22	0.282871	7.3e-05	0.000738	3.4e-05	0.282868	3.04118	1.29073	8.2736	240.424
15EPM20-23	0.282923	7.8e-05	0.000807	2.3e-05	0.282919	4.88003	1.37914	10.2776	248.466
15EPM20-24	0.28289	7.8e-05	0.000522	3.4e-05	0.282888	3.71307	1.37914	9.00138	241.387
15EPM20-3	0.282921	8.8e-05	0.000602	2.2e-05	0.282918	4.80931	1.55595	9.89491	232.694
15EPM20-4	0.28298	0.0001	0.000886	1.5e-05	0.282976	6.8957	1.76813	12.113	240.719
15EPM20-5	0.282955	6.8e-05	0.00073	3e-05	0.282952	6.01163	1.20233	11.2323	239.754
15EPM20-6	0.282929	8.8e-05	0.00101	0.00011	0.282924	5.09221	1.55595	10.4418	247.787
15EPM20-7	0.282936	8.6e-05	0.001168	1.5e-05	0.282931	5.33975	1.52059	10.4312	237.003
15EPM20-8	0.28296	0.0001	0.001473	1.4e-05	0.282953	6.18845	1.76813	11.3349	241.799
15EPM20-9	0.282905	8.5e-05	0.000876	1.1e-05	0.282901	4.24351	1.50291	9.5136	243.139
Sample LMT-1: (El Paso Mtns)
15EPM22-1	0.282474	9.1e-05	0.001733	4.3e-05	0.282468	-10.9978	1.609	-7.34031	173.692
15EPM22-10	0.282388	8.4e-05	0.001682	5.9e-05	0.282382	-14.0389	1.48523	-10.2068	181.737
15EPM22-11	0.282394	8.9e-05	0.0010178	6.2e-06	0.282391	-13.8268	1.57363	-9.95842	179.71
15EPM22-12	0.282426	8.6e-05	0.000962	8.8e-05	0.282423	-12.6952	1.52059	-8.95605	173.402
15EPM22-13	0.282456	7.7e-05	0.001475	3.2e-05	0.282451	-11.6343	1.36146	-7.83791	178.842
15EPM22-14	0.282425	9.7e-05	0.001627	7.3e-05	0.28242	-12.7305	1.71508	-8.99106	177.023
15EPM22-15	0.282435	7.3e-05	0.001318	6.5e-05	0.282431	-12.3769	1.29073	-8.53529	180.103
15EPM22-16	0.282441	8.3e-05	0.001393	2.9e-05	0.282436	-12.1647	1.46755	-8.40977	176.454
15EPM22-17	0.282444	9.7e-05	0.000719	2.2e-05	0.282442	-12.0586	1.71508	-8.20566	177.341
15EPM22-18	0.28244	7.5e-05	0.001238	2e-05	0.282436	-12.2001	1.3261	-8.48314	173.836
15EPM22-19	0.282417	9.9e-05	0.001414	4e-05	0.282412	-13.0134	1.75045	-9.23747	177.57
15EPM22-2	0.282461	8.8e-05	0.001195	2.8e-05	0.282457	-11.4575	1.55595	-7.73926	173.651
15EPM22-20	0.282475	7.8e-05	0.000593	2.8e-05	0.282473	-10.9624	1.37914	-7.25028	170.199
15EPM22-21	0.282419	7.2e-05	0.001251	3.5e-05	0.282415	-12.9427	1.27305	-9.4433	163.76
15EPM22-22	0.282446	7.8e-05	0.001465	7.7e-05	0.282441	-11.9879	1.37914	-8.43953	167.135
15EPM22-23	0.282546	9.3e-05	0.001402	6.6e-05	0.282542	-8.45165	1.64436	-4.84228	169.608
15EPM22-24	0.28248	8.5e-05	0.001009	7.6e-05	0.282477	-10.7856	1.50291	-7.09245	171.487
15EPM22-3	0.282376	8e-05	0.0008141	2.8e-06	0.282374	-14.4633	1.4145	-11.1863	151.349
15EPM22-4	0.282495	9.2e-05	0.001726	4.4e-05	0.282489	-10.2551	1.62668	-6.53784	176.476
15EPM22-5	0.282501	9e-05	0.00329	0.00014	0.28249	-10.043	1.59131	-6.55724	174.032
15EPM22-6	0.282431	9.4e-05	0.0011632	6.1e-06	0.282427	-12.5183	1.66204	-8.77687	174.584
15EPM22-7	0.282544	8e-05	0.001348	6.6e-05	0.28254	-8.52238	1.4145	-4.79219	174.982
15EPM22-8	0.282487	7.8e-05	0.0012393	8.3e-06	0.282483	-10.538	1.37914	-6.76818	176.283
15EPM22-9	0.282481	8.2e-05	0.00137	0.00013	0.282476	-10.7502	1.44986	-6.96445	177.746
Sample CCQM: (El Paso Mtns)
ccqm-1	0.282675	8.2e-05	0.001369	1.4e-05	0.282669	-3.88988	1.44986	1.42482	249.139
ccqm-10	0.28271	7e-05	0.001938	2.7e-05	0.282701	-2.65219	1.23769	2.66751	253.81
ccqm-11	0.282709	8.2e-05	0.0011445	7e-06	0.282704	-2.68755	1.44986	2.68412	250.034
ccqm-12	0.282672	8.6e-05	0.001369	2.1e-05	0.282665	-3.99597	1.52059	1.4648	255.969
ccqm-13	0.282617	7.9e-05	0.001469	1.7e-05	0.28261	-5.94091	1.39682	-0.614744	250.504
ccqm-14	0.282365	7.7e-05	0.001098	4.1e-05	0.28236	-14.8523	1.36146	-9.35809	255.675
ccqm-15	0.28269	0.0001	0.001207	7e-06	0.282684	-3.35944	1.76813	1.97547	248.823
ccqm-16	0.282736	7.5e-05	0.001303	1.1e-05	0.28273	-1.73277	1.3261	3.65497	251.982
ccqm-17	0.282612	8.2e-05	0.00211	0.00015	0.282602	-6.11772	1.44986	-0.997243	245.753
ccqm-18	0.282665	7.8e-05	0.001346	1.6e-05	0.282659	-4.24351	1.37914	1.10843	250.71
ccqm-19	0.282742	8.2e-05	0.001756	3.3e-05	0.282734	-1.52059	1.44986	3.87669	256.002
ccqm-2	0.282649	9e-05	0.001502	4.1e-05	0.282642	-4.80931	1.59131	0.62949	256.018
ccqm-20	0.282714	8.3e-05	0.002519	3e-05	0.282702	-2.51074	1.46755	2.55998	246.472
ccqm-21	0.282735	8.6e-05	0.001705	3.6e-05	0.282727	-1.76813	1.52059	3.47923	248.521
ccqm-22	0.282673	7.4e-05	0.000929	1.8e-05	0.282669	-3.96061	1.30841	1.49016	252.068
ccqm-23	0.282722	7.5e-05	0.001981	1.2e-05	0.282713	-2.22784	1.3261	3.01631	250.544
ccqm-24	0.28273	0.00011	0.002142	3.2e-05	0.28272	-1.94494	1.94494	3.28219	251
ccqm-3	0.28226	9.5e-05	0.000978	3.8e-05	0.282241	-18.5653	1.67972	4.32898	1052.12
ccqm-4	0.282721	7.6e-05	0.001511	7.1e-05	0.282714	-2.2632	1.34378	3.02317	248.867
ccqm-5	0.282691	6.5e-05	0.00088	3.3e-05	0.282687	-3.32408	1.14928	2.12769	251.721
ccqm-6	0.282776	7.6e-05	0.001927	9.1e-05	0.282767	-0.318263	1.34378	4.89456	248.578
ccqm-7	0.282646	8e-05	0.001633	1.2e-05	0.282638	-4.9154	1.4145	0.456222	253.901
ccqm-8	0.282676	8.3e-05	0.002068	1.4e-05	0.282666	-3.85452	1.46755	1.40323	251.926
ccqm-9	0.282007	7.2e-05	0.000886	1.3e-05	0.282003	-27.5121	1.27305	-22.1087	250.157
Sample GF: (El Paso Mtns)
GF-1	0.282594	9.5e-05	0.002352	2.2e-05	0.282582	-6.75425	1.67972	-1.15049	270.972
GF-10	0.282699	9.4e-05	0.00481	0.00021	0.282675	-3.04118	1.66204	2.10567	270.029
GF-11	0.28262	0.0001	0.001491	1.6e-05	0.282612	-5.83482	1.76813	0.0533894	277.04
GF-13	0.282613	8.9e-05	0.00215	0.00014	0.282602	-6.08236	1.57363	-0.253809	279.981
GF-14	0.282811	8.7e-05	0.000942	6e-05	0.282806	0.919426	1.53827	6.48574	257.369
GF-2	0.282604	9e-05	0.001278	4.6e-05	0.282598	-6.40062	1.59131	-0.622118	270.123
GF-3	0.282594	9.1e-05	0.00191	3.1e-05	0.282584	-6.75425	1.609	-0.919406	278.185
GF-4	0.282558	8.6e-05	0.000861	1.7e-05	0.282554	-8.0273	1.52059	-2.00356	278.019
GF-5	0.282619	8.7e-05	0.00229	2e-05	0.282607	-5.87018	1.53827	-0.296399	268.969
GF-6	0.282588	8.2e-05	0.002062	3.6e-05	0.282578	-6.96642	1.44986	-1.32683	270.204
GF-7	0.282948	7.5e-05	0.001633	2.8e-05	0.282944	5.7641	1.3261	8.78368	142.751
GF-9	0.28256	0.00011	0.002441	9.9e-05	0.282547	-7.95657	1.94494	-2.2138	278.5
Sample LCP-1: (El Paso Mtns)
lcp-1-1	0.282895	6.7e-05	0.000618	1.2e-05	0.282892	3.88988	1.18465	9.12019	239.435
lcp-1-10	0.282921	9.1e-05	0.00064944	9.4e-07	0.282918	4.80931	1.609	9.99093	237.416
lcp-1-11	0.28301	0.00012	0.001068	3.1e-05	0.283005	7.95657	2.12175	13.0107	234.484
lcp-1-12	0.282894	8.1e-05	0.000924	9.6e-06	0.28289	3.85452	1.43218	9.01419	238.416
lcp-1-13	0.282896	7.7e-05	0.0008796	7.3e-06	0.282892	3.92524	1.36146	9.11066	239.277
lcp-1-14	0.28296	0.00011	0.0009676	2.7e-06	0.282956	6.18845	1.94494	11.369	239.641
lcp-1-15	0.28293	8.6e-05	0.0011197	8e-06	0.282925	5.12757	1.52059	10.2721	239.113
lcp-1-16	0.282952	7e-05	0.0010361	5.3e-06	0.282947	5.90555	1.23769	11.0488	238.424
lcp-1-17	0.282923	6.9e-05	0.000617	4.9e-05	0.28292	4.88003	1.22001	10.1852	242.818
lcp-1-18	0.28291	7.6e-05	0.0007454	3e-06	0.282907	4.42032	1.34378	9.65293	240.453
lcp-1-19	0.282908	7.9e-05	0.001375	4.4e-05	0.282902	4.34959	1.39682	9.30044	231.973
lcp-1-2	0.282912	9.2e-05	0.001184	1.7e-05	0.282907	4.49104	1.62668	9.62372	239.053
lcp-1-20	0.282859	7.9e-05	0.0005856	8.9e-06	0.282856	2.61683	1.39682	7.86143	239.884
lcp-1-21	0.282867	7.3e-05	0.0008207	5.6e-06	0.282863	2.89973	1.29073	8.11363	240.182
lcp-1-22	0.282885	8.2e-05	0.0012603	5.6e-06	0.282879	3.53626	1.44986	8.67765	240.045
lcp-1-23	0.282867	8.7e-05	0.0010128	3.6e-06	0.282862	2.89973	1.53827	8.0499	238.648
lcp-1-24	0.282841	8.6e-05	0.000441	5.4e-06	0.282839	1.9803	1.52059	7.38812	246.269
lcp-1-3	0.282872	9.1e-05	0.0008648	9.8e-06	0.282868	3.07654	1.609	8.38716	244.949
lcp-1-4	0.282876	7.3e-05	0.000925	1.2e-05	0.282872	3.21799	1.29073	8.37398	238.269
lcp-1-5	0.28285	0.0001	0.00114	3.3e-05	0.282845	2.29857	1.76813	7.42747	238.609
lcp-1-6	0.28298	0.00012	0.0010823	8.9e-06	0.282975	6.8957	2.12175	12.0623	239.819
lcp-1-7	0.282891	7.6e-05	0.000841	3.5e-05	0.282887	3.74843	1.34378	8.97025	240.673
lcp-1-8	0.282913	9e-05	0.000924	1e-05	0.282909	4.52641	1.59131	9.7542	241.539
lcp-1-9	0.282912	7.3e-05	0.001461	3.6e-05	0.282905	4.49104	1.29073	9.56839	238.515
Sample MCP-1: (El Paso Mtns)
MCP-1-1	0.282892	9.1e-05	0.002449	6.9e-05	0.28288	3.78379	1.609	9.21147	263
MCP-1-10	0.282952	7.3e-05	0.001582	3.9e-05	0.282944	5.90555	1.29073	11.5067	264
MCP-1-11	0.28296	0.0001	0.002552	1e-05	0.282948	6.18845	1.76813	11.5356	259.9
MCP-1-12	0.282902	8.5e-05	0.001926	4.3e-05	0.282892	4.13742	1.50291	9.73427	266.7
MCP-1-13	0.282915	8.5e-05	0.00158	5.6e-05	0.282907	4.59713	1.50291	10.1468	261.6
MCP-1-14	0.282919	8.3e-05	0.001595	1.6e-05	0.282911	4.73858	1.46755	10.1412	254.8
MCP-1-15	0.282855	9.1e-05	0.001598	4.9e-05	0.282847	2.47538	1.609	7.88467	255.2
MCP-1-16	0.282942	9e-05	0.001868	4.6e-05	0.282933	5.55192	1.59131	11.0122	259.7
MCP-1-17	0.2826	8.3e-05	0.001009	6.4e-05	0.282595	-6.54207	1.46755	-0.992948	257.3
MCP-1-18	0.282927	9.3e-05	0.002056	2e-05	0.282917	5.02148	1.64436	10.424	258.5
MCP-1-19	0.282855	8.5e-05	0.001775	1.6e-05	0.282846	2.47538	1.50291	7.89281	257
MCP-1-2	0.28289	0.0001	0.001485	3.9e-05	0.282883	3.71307	1.76813	9.37262	266
MCP-1-20	0.282876	8.5e-05	0.001415	5.5e-05	0.282869	3.21799	1.50291	8.69712	257
MCP-1-21	0.282915	8.9e-05	0.001455	1.9e-05	0.282908	4.59713	1.57363	10.0702	257
MCP-1-3	0.282907	9.1e-05	0.001767	7.8e-05	0.282898	4.31423	1.609	9.89061	264.4
MCP-1-4	0.282714	9.5e-05	0.00148	7.1e-05	0.282707	-2.51074	1.67972	3.07775	262.8
MCP-1-5	0.282859	8.4e-05	0.001335	4.1e-05	0.282852	2.61683	1.48523	8.18853	260.7
MCP-1-6	0.282904	9.8e-05	0.00138	2e-05	0.282897	4.20814	1.73277	9.74517	259.4
MCP-1-7	0.282907	9.8e-05	0.001374	8.2e-05	0.2829	4.31423	1.73277	9.75171	254.7
MCP-1-8	0.282873	8.5e-05	0.001435	7.2e-05	0.282866	3.1119	1.50291	8.61748	258.4
MCP-1-9	0.282921	8.5e-05	0.00267	0.00011	0.282908	4.80931	1.50291	10.0881	257.6
Sample MCPF: (El Paso Mtns)
MCPF-1	0.282652	8.8e-05	0.001356	1.1e-05	0.282645	-4.70322	1.55595	0.796972	257.727
MCPF-10	0.282555	7.5e-05	0.001472	2.2e-05	0.282548	-8.13339	1.3261	-2.70424	255.415
MCPF-12	0.282666	7.2e-05	0.001404	2e-05	0.282659	-4.20814	1.27305	1.2094	254.23
MCPF-13	0.282781	7.9e-05	0.001757	5.8e-05	0.282773	-0.14145	1.39682	5.264	256.359
MCPF-14	0.282693	8.7e-05	0.001548	2.4e-05	0.282686	-3.25336	1.53827	2.22873	258.377
MCPF-15	0.282559	7.1e-05	0.001505	2.1e-05	0.282552	-7.99194	1.25537	-2.62672	252.672
MCPF-16	0.282704	9.3e-05	0.001492	2.5e-05	0.282697	-2.86437	1.64436	2.51791	253.235
MCPF-18	0.282721	9.2e-05	0.000998	2.5e-05	0.282716	-2.2632	1.62668	3.36486	260.747
MCPF-2	0.282392	8e-05	0.001745	3.6e-05	0.282378	-13.8975	1.4145	-4.89684	426.484
MCPF-21	0.282701	6.8e-05	0.001559	2e-05	0.282693	-2.97045	1.20233	2.52185	258.938
MCPF-22	0.282344	8.3e-05	0.0005449	8.7e-06	0.282332	-15.5949	1.46755	9.87585	1153.44
MCPF-3	0.282444	7.8e-05	0.00085	1.9e-05	0.282431	-12.0586	1.37914	5.33453	797.999
MCPF-4	0.282668	7.8e-05	0.002078	5e-05	0.282658	-4.13742	1.37914	1.20732	256.171
MCPF-5	0.281929	8.2e-05	0.001	2.8e-05	0.281919	-30.2703	1.44986	-19.2627	510.013
MCPF-6	0.282662	8.9e-05	0.001502	5.8e-05	0.282653	-4.34959	1.57363	2.24543	310.234
MCPF-7	0.282628	7.6e-05	0.001578	5.1e-05	0.28262	-5.55192	1.34378	-0.0540329	259.424
MCPF-8	0.281812	8.6e-05	0.0009894	3.5e-06	0.281807	-34.4078	1.52059	-29.0064	251.038
MCPF-9	0.282747	8e-05	0.001885	3.3e-05	0.282738	-1.34378	1.4145	3.95159	252.196
Sample PWM-1CA: (El Paso Mtns)
PWM-1 CA-1	0.282818	9.4e-05	0.000872	6.9e-05	0.282814	1.16696	1.66204	6.7085	255.674
PWM-1 CA-10	0.282812	7.8e-05	0.000771	7.6e-05	0.282808	0.954789	1.37914	6.57617	258.557
PWM-1 CA-11	0.282817	8.4e-05	0.0007433	5.5e-06	0.282813	1.1316	1.48523	6.79931	260.458
PWM-1 CA-12	0.282832	8.3e-05	0.000858	3.3e-05	0.282828	1.66204	1.46755	7.18655	254.769
PWM-1 CA-13	0.282829	7.9e-05	0.001134	5.6e-05	0.282823	1.55595	1.39682	7.13649	259.529
PWM-1 CA-14	0.282834	9.8e-05	0.000614	2.4e-05	0.282831	1.73277	1.73277	7.38514	258.725
PWM-1 CA-15	0.2828	9.4e-05	0.0007453	3.5e-06	0.282796	0.530438	1.66204	6.09921	255.956
PWM-1 CA-16	0.282799	6.1e-05	0.001289	4.7e-05	0.282793	0.495076	1.07856	5.98756	256.696
PWM-1 CA-17	0.28282	0.00011	0.001097	4.2e-05	0.282815	1.23769	1.94494	6.75917	256.508
PWM-1 CA-18	0.28286	0.00013	0.00123	0.00011	0.282854	2.65219	2.29857	8.15814	256.799
PWM-1 CA-19	0.282773	8.5e-05	0.000825	4.8e-05	0.282769	-0.424351	1.50291	5.14866	256.796
PWM-1 CA-2	0.282796	8.8e-05	0.001322	5.5e-05	0.28279	0.388988	1.55595	5.84587	255.3
PWM-1 CA-20	0.282845	9.1e-05	0.000504	1.9e-05	0.282843	2.12175	1.609	7.77755	258.013
PWM-1 CA-21	0.282826	8.3e-05	0.0007649	4.5e-06	0.282822	1.44986	1.46755	7.03514	256.841
PWM-1 CA-22	0.282799	7.2e-05	0.001044	2.1e-05	0.282794	0.495076	1.27305	6.08649	259.345
PWM-1 CA-23	0.282792	8.4e-05	0.000762	1.2e-05	0.282788	0.247538	1.48523	5.82278	256.39
PWM-1 CA-24	0.282767	6.7e-05	0.000767	2e-05	0.282763	-0.636526	1.18465	4.96921	257.85
PWM-1 CA-3	0.28275	0.0001	0.000896	5.5e-05	0.282746	-1.23769	1.76813	4.2772	254.697
PWM-1 CA-4	0.282754	9.5e-05	0.001419	7.5e-05	0.282747	-1.09624	1.67972	4.28047	252.355
PWM-1 CA-5	0.282902	9.4e-05	0.00131	0.00012	0.282895	4.13742	1.66204	9.83335	266.247
PWM-1 CA-6	0.282845	8.1e-05	0.000951	1.2e-05	0.28284	2.12175	1.43218	7.68813	257.411
PWM-1 CA-7	0.282695	8.8e-05	0.001545	4.4e-05	0.282688	-3.18263	1.55595	2.21954	254.596
PWM-1 CA-8	0.282802	8.5e-05	0.000752	5.3e-05	0.282798	0.601163	1.50291	6.09576	252.606
PWM-1 CA-9	0.282655	9.3e-05	0.000767	3.4e-05	0.282651	-4.59713	1.64436	1.13413	263.713
Sample TRBS-1: (El Paso Mtns)
trbs-1-1	0.282957	7.3e-05	0.000812	1.4e-05	0.282953	6.08236	1.29073	11.6182	254.819
trbs-1-10	0.282847	7.8e-05	0.0006331	9.2e-06	0.282844	2.19248	1.37914	7.52216	244.125
trbs-1-11	0.2829	7.2e-05	0.001203	2.2e-05	0.282895	4.06669	1.27305	9.23945	241.066
trbs-1-12	0.28293	9.2e-05	0.000827	7.2e-05	0.282926	5.12757	1.62668	10.4592	245.579
trbs-1-13	0.282864	8e-05	0.000815	2.1e-05	0.28286	2.79364	1.4145	8.15452	246.893
trbs-1-14	0.282871	6.8e-05	0.000627	1.4e-05	0.282868	3.04118	1.20233	8.41295	245.981
trbs-1-15	0.282916	8.1e-05	0.001265	1.8e-05	0.28291	4.63249	1.43218	9.82225	242.304
trbs-1-16	0.282893	9.1e-05	0.001003	3.1e-05	0.282888	3.81916	1.609	9.15403	247.085
trbs-1-17	0.282872	6.4e-05	0.001156	2.4e-05	0.282867	3.07654	1.1316	8.30438	243.298
trbs-1-18	0.282869	7.3e-05	0.0004712	5e-06	0.282867	2.97045	1.29073	7.57042	209.738
trbs-1-19	0.282874	8.9e-05	0.001069	6.2e-05	0.282869	3.14727	1.57363	8.39717	243.67
trbs-1-2	0.28296	0.00011	0.001307	1.1e-05	0.282954	6.18845	1.94494	11.3971	243.459
trbs-1-20	0.282895	8.6e-05	0.000995	4.8e-06	0.28289	3.88988	1.52059	9.15394	243.753
trbs-1-21	0.28287	8.7e-05	0.001023	1.7e-05	0.282865	3.00582	1.53827	8.24118	242.658
trbs-1-22	0.282924	8.9e-05	0.0009435	7.7e-06	0.28292	4.9154	1.57363	10.2019	244.378
trbs-1-23	0.282988	7.3e-05	0.001499	1.1e-05	0.282981	7.1786	1.29073	12.3133	241.417
trbs-1-24	0.28298	0.0001	0.000423	1.7e-05	0.282978	6.8957	1.76813	12.2919	245.488
trbs-1-3	0.282924	8.6e-05	0.001408	5.5e-05	0.282918	4.9154	1.52059	10.0359	240.133
trbs-1-4	0.2829	0.0001	0.001378	9.1e-05	0.282894	4.06669	1.76813	9.2878	244.63
trbs-1-5	0.282861	9.2e-05	0.0009817	4.1e-06	0.282856	2.68755	1.62668	8.00327	246.069
trbs-1-6	0.28291	0.00012	0.001461	3.2e-05	0.282903	4.42032	2.12175	9.75662	250.646
trbs-1-7	0.282924	9.1e-05	0.0007761	8.6e-06	0.28292	4.9154	1.609	10.2944	247.38
trbs-1-8	0.282925	7.6e-05	0.001187	2.8e-05	0.28292	4.95076	1.34378	10.2269	245.725
trbs-1-9	0.2829	0.00011	0.001093	1.3e-05	0.282895	4.06669	1.94494	9.3097	243.506
Sample TRBS-2: (El Paso Mtns)
TRBS2-1	0.282897	8.3e-05	0.00112	1.4e-05	0.282892	3.96061	1.46755	9.1008	238.945
TRBS2-10	0.282909	8.4e-05	0.000747	3.8e-05	0.282905	4.38496	1.48523	9.91329	254.016
TRBS2-11	0.282947	9e-05	0.000766	5e-05	0.282944	5.72873	1.59131	10.9607	240.542
TRBS2-12	0.283095	8e-05	0.00159	0.00012	0.283091	10.9624	1.4145	14.0374	145.094
TRBS2-13	0.28296	0.0001	0.001212	6.4e-05	0.282955	6.18845	1.76813	11.267	236.702
TRBS2-14	0.2829	8.8e-05	0.001245	2.7e-05	0.282894	4.06669	1.55595	9.20956	239.987
TRBS2-15	0.282942	9e-05	0.00123	0.00011	0.282937	5.55192	1.59131	10.5859	234.775
TRBS2-16	0.282915	7.8e-05	0.0006732	6.9e-06	0.282912	4.59713	1.37914	9.84407	240.578
TRBS2-17	0.282911	7.5e-05	0.000841	2.1e-05	0.282907	4.45568	1.3261	9.91219	251.441
TRBS2-18	0.282841	9e-05	0.0005835	1.7e-06	0.282838	1.9803	1.59131	7.128	235.464
TRBS2-19	0.282854	8.6e-05	0.000804	5.8e-05	0.28285	2.44002	1.52059	7.95914	254.084
TRBS2-2	0.282959	8.6e-05	0.001071	9.6e-05	0.282954	6.15308	1.52059	11.2596	236.975
TRBS2-20	0.282954	7e-05	0.000694	2e-05	0.282951	5.97627	1.23769	11.1358	236.699
TRBS2-21	0.282915	8.2e-05	0.000995	1.9e-05	0.28291	4.59713	1.44986	10.2063	259.667
TRBS2-22	0.282942	8.2e-05	0.000711	3e-05	0.282939	5.55192	1.44986	10.6574	234.355
TRBS2-23	0.282991	8.7e-05	0.00175	0.00013	0.282983	7.28469	1.53827	12.3877	241.815
TRBS2-24	0.282804	8.7e-05	0.001353	3.3e-05	0.282798	0.671889	1.53827	6.08729	253.6
TRBS2-3	0.28291	9e-05	0.000758	7.7e-06	0.282907	4.42032	1.59131	9.7299	244.073
TRBS2-4	0.282933	8.9e-05	0.00103	0.00011	0.282928	5.23366	1.57363	10.3345	236.436
TRBS2-5	0.282958	9.1e-05	0.0010271	2.5e-06	0.282953	6.11772	1.609	11.3058	240.424
TRBS2-6	0.282929	7.5e-05	0.000782	1.6e-05	0.282925	5.09221	1.3261	10.4493	246.415
TRBS2-7	0.282943	8.3e-05	0.0008402	8.8e-06	0.282939	5.58728	1.46755	10.6733	234.381
TRBS2-8	0.282944	8.8e-05	0.000901	1.7e-05	0.28294	5.62265	1.55595	11.0394	250.041
TRBS2-9	0.282783	8.4e-05	0.000942	7.4e-05	0.282779	-0.0707251	1.48523	5.18419	243.036
Sample LM-1: (Lane Mtn)
LM1-1	0.28281	0.0001	0.0006614	8.5e-06	0.282807	0.884064	1.5	6.40259	253
LM1-2	0.282775	7.5e-05	0.000937	1e-05	0.282771	-0.353626	1.5	5.07466	251
LM1-3	0.282787	7.7e-05	0.000753	4.5e-05	0.282783	0.0707251	1.5	5.4862	249
LM1-4	0.28284	0.00015	0.001219	2e-05	0.282834	1.94494	1.5	7.39216	254
LM1-5	0.2827	0.00014	0.0007467	3.4e-06	0.282696	-3.00582	1.5	2.64892	260
LM1-6	0.282829	9.1e-05	0.0006855	6.7e-06	0.282826	1.55595	1.5	7.202	259
LM1-7	0.28279	0.00012	0.002869	2e-05	0.282777	0.176813	1.5	5.26389	250
LM1-8	0.28283	0.0001	0.0006081	3.9e-06	0.282827	1.59131	1.5	6.92197	244
LM1-9	0.2828	0.0001	0.001067	1.7e-05	0.282795	0.530438	1.5	5.65678	238
LM1-10	0.2828	0.0001	0.001158	2.2e-05	0.282797	0.530438	1.5	3.85649	155
LM1-11	0.282782	9.7e-05	0.00083	2.5e-05	0.282778	-0.106088	1.5	5.20956	245
LM1-12	0.282826	7.4e-05	0.001324	5.9e-05	0.28282	1.44986	1.5	6.81484	251
LM1-14	0.282808	8.6e-05	0.001272	1.6e-05	0.282804	0.813339	1.5	4.0207	150
LM1-15	0.282781	8.2e-05	0.0008456	6.8e-06	0.282777	-0.14145	1.5	5.4109	256
LM1-16	0.282785	8.8e-05	0.0009	2e-05	0.282781	0	1.5	5.1958	240
LM1-17	0.282855	9.9e-05	0.000911	2e-05	0.282852	2.47538	1.5	5.65412	147
LM1-18	0.28276	0.0001	0.000964	1.2e-05	0.282756	-0.884064	1.5	4.47443	248
LM1-19	0.28281	0.00012	0.001176	1.2e-05	0.282804	0.884064	1.5	6.38099	256
LM1-20	0.28287	0.0001	0.001536	1.4e-05	0.282863	3.00582	1.5	8.44293	256
LM1-21	0.28281	0.00013	0.001234	5.3e-05	0.282804	0.884064	1.5	6.28517	252
LM1-22	0.28277	0.0001	0.001379	2.4e-05	0.282763	-0.530438	1.5	4.86708	253
LM1-23	0.28283	0.0001	0.000925	1.9e-05	0.282826	1.59131	1.5	7.06608	253
LM1-24	0.282843	9.4e-05	0.000866	1.8e-05	0.282839	2.05103	1.5	7.55768	254
LM1-25	0.282759	8.4e-05	0.001127	1.7e-05	0.282754	-0.919426	1.5	4.64947	259
LM1-26	0.282865	9.2e-05	0.0005863	5.5e-06	0.282862	2.829	1.5	8.71216	269
Sample LM-4: (Lane Mtn)
LM4-1	0.28278	0.0001	0.0006544	1.7e-06	0.282778	-0.176813	1.5	3.00418	146
LM4-2	0.282842	9.1e-05	0.0006016	3.7e-06	0.28284	2.01567	1.5	5.33367	152
LM4-3	0.282868	6.9e-05	0.0007648	8e-06	0.282866	2.93509	1.5	6.14125	147.6
LM4-4	0.282818	9.6e-05	0.0007038	3e-06	0.282816	1.16696	1.5	4.3676	147.1
LM4-5	0.282731	6.9e-05	0.0012422	6.8e-06	0.282728	-1.90958	1.5	1.28483	149.3
LM4-6	0.282739	8.4e-05	0.001346	1.9e-05	0.282735	-1.62668	1.5	1.62808	152.6
LM4-7	0.282656	9.6e-05	0.001249	3.5e-05	0.282653	-4.56177	1.5	-1.42461	146.7
LM4-8	0.28279	0.00011	0.0008246	4.2e-06	0.282788	0.176813	1.5	3.53041	154.7
LM4-9	0.28278	0.00011	0.0007752	3.2e-06	0.282778	-0.176813	1.5	3.23826	157.3
LM4-10	0.282817	8.6e-05	0.000862	6.4e-05	0.282814	1.1316	1.5	4.5099	156
LM4-11	0.28284	0.00011	0.001743	3.1e-05	0.282835	1.94494	1.5	5.01307	145.6
LM4-12	0.282675	9.2e-05	0.0010502	9.3e-06	0.282672	-3.88988	1.5	-0.711662	147.7
LM4-13	0.28279	8.7e-05	0.0011902	9.1e-06	0.282787	0.176813	1.5	3.33196	147.2
LM4-14	0.282789	9.5e-05	0.0009435	6.7e-06	0.282786	0.14145	1.5	3.32925	147.6
LM4-15	0.282724	7.5e-05	0.000746	1.6e-05	0.282722	-2.15712	1.5	1.24725	156.7
LM4-16	0.28281	0.0001	0.00068	8.3e-06	0.282808	0.884064	1.5	4.11528	148.4
LM4-17	0.28268	0.00012	0.00719	0.00051	0.28266	-3.71307	1.5	-1.09956	149.7
LM4-18	0.282806	9.3e-05	0.0005888	3e-06	0.282804	0.742614	1.5	4.15334	156.2
LM4-19	0.282751	9.9e-05	0.0006501	4.1e-06	0.282749	-1.20233	1.5	2.04641	149.1
LM4-20	0.28274	0.0001	0.001458	7e-05	0.282736	-1.59131	1.5	1.85232	162
LM4-21	0.28276	0.0001	0.0008957	7.2e-06	0.282757	-0.884064	1.5	2.39473	151.6
LM4-22	0.28277	0.0001	0.00148	1.6e-05	0.282766	-0.530438	1.5	2.58775	146.8
LM4-23	0.28275	9.9e-05	0.001121	3.2e-05	0.282747	-1.23769	1.5	2.01624	151.5
LM4-24	0.282775	9.7e-05	0.001333	4.4e-05	0.282771	-0.353626	1.5	2.80882	148.2
LM4-25	0.282799	8.7e-05	0.000466	2.1e-05	0.282798	0.495076	1.5	3.85474	153.3
Sample FPG-1CA: (Fremont Peak)
FPG-1 CA-1	0.282633	7.9e-05	0.0005501	3.7e-06	0.28263	-5.37511	1.39682	0.42256	265.034
FPG-1 CA-10	0.282649	8.4e-05	0.000511	1.5e-05	0.282648	-4.80931	1.48523	-1.99966	128.483
FPG-1 CA-11	0.282658	7.8e-05	0.000541	1.8e-05	0.282655	-4.49104	1.37914	1.37427	268.019
FPG-1 CA-12	0.282659	9.2e-05	0.000641	3e-06	0.282656	-4.45568	1.62668	1.39811	268.303
FPG-1 CA-13	0.28277	0.00011	0.001002	4.4e-06	0.282765	-0.530438	1.94494	5.40346	274.856
FPG-1 CA-14	0.282702	7.7e-05	0.000655	1.1e-05	0.282699	-2.93509	1.36146	2.9094	267.95
FPG-1 CA-15	0.282668	8.7e-05	0.000552	1.5e-05	0.282665	-4.13742	1.53827	1.78578	270.736
FPG-1 CA-16	0.282737	7.9e-05	0.000964	9.5e-05	0.282732	-1.6974	1.39682	4.05056	265.993
FPG-1 CA-17	0.282647	8.8e-05	0.000813	2.7e-05	0.282643	-4.88003	1.55595	0.963687	269.256
FPG-1 CA-18	0.282654	8.9e-05	0.0005834	2.5e-06	0.282651	-4.63249	1.57363	1.32389	272.52
FPG-1 CA-19	0.282522	8.4e-05	0.001521	1.3e-05	0.282514	-9.30035	1.48523	-3.51957	272.354
FPG-1 CA-2	0.282646	9e-05	0.0004467	6.1e-06	0.282644	-4.9154	1.59131	0.943961	267
FPG-1 CA-20	0.282704	8.4e-05	0.0008058	3.1e-06	0.2827	-2.86437	1.48523	2.96443	268.456
FPG-1 CA-21	0.282617	7.1e-05	0.000674	2.1e-05	0.282614	-5.94091	1.25537	0.00710394	272.921
FPG-1 CA-22	0.282685	8.6e-05	0.0005011	8.1e-06	0.282682	-3.53626	1.52059	2.37869	269.929
FPG-1 CA-23	0.282693	9e-05	0.0007402	2.8e-06	0.282689	-3.25336	1.59131	2.62941	270.405
FPG-1 CA-25	0.282669	8.2e-05	0.0006493	3.6e-06	0.282666	-4.10206	1.44986	1.69509	265.772
FPG-1 CA-3	0.282745	9.7e-05	0.0003859	4.8e-06	0.282743	-1.4145	1.71508	4.5124	269.48
FPG-1 CA-4	0.282736	8e-05	0.00104	1.1e-05	0.282731	-1.73277	1.4145	4.12574	271.724
FPG-1 CA-5	0.282645	7.6e-05	0.00075	1.4e-05	0.282641	-4.95076	1.34378	0.949835	271.35
FPG-1 CA-6	0.282702	9.1e-05	0.0008043	4.6e-06	0.282698	-2.93509	1.609	3.00075	273.36
FPG-1 CA-7	0.282739	9e-05	0.000806	5.1e-05	0.282736	-1.62668	1.59131	2.53074	191.625
FPG-1 CA-8	0.282741	7.7e-05	0.0006896	5.2e-06	0.282737	-1.55595	1.36146	4.37804	272.287
FPG-1 CA-9	0.28269	0.00013	0.000837	2.4e-05	0.282686	-3.35944	2.29857	2.37018	264.166
